# Supplementary material for: Multivariate statistical modelling of extreme coastal water levels andthe effect of climate variability: a case study in the Netherlands
Source: Copernicus journal article supplement (doi:10.5194/hess-2020-536), 2020-10-27

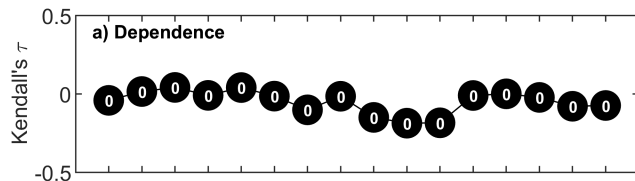

| Copula                 |                             | Independen.<br>test<br>Sig. $\alpha = 0.05$                                                                                                                                                                                                                                                                                                                                 |
|------------------------|-----------------------------|-----------------------------------------------------------------------------------------------------------------------------------------------------------------------------------------------------------------------------------------------------------------------------------------------------------------------------------------------------------------------------|
| 0. Independence        | 29. Rot. BB7 (90°)          | <div style="display: flex; align-items: center;"> <div style="width: 10px; height: 10px; background-color: red; border-radius: 50%; margin-right: 5px;"></div> Sig.         </div> <div style="display: flex; align-items: center;"> <div style="width: 10px; height: 10px; background-color: black; border-radius: 50%; margin-right: 5px;"></div> Not sig.         </div> |
| 1. Gaussian            | 33. Rot. Clayton (270°)     |                                                                                                                                                                                                                                                                                                                                                                             |
| 5. Frank               | 34. Rot. Gumbel (270°)      |                                                                                                                                                                                                                                                                                                                                                                             |
| 23. Rot. Clayton (90°) | 37. Rot. BB1 (270°)         |                                                                                                                                                                                                                                                                                                                                                                             |
| 24. Rot. Gumbel (90°)  | 39. Rot. BB7 (270°)         |                                                                                                                                                                                                                                                                                                                                                                             |
| 26. Rot. Joe (90°)     | 124. Rot. Tawn type 1 (90°) |                                                                                                                                                                                                                                                                                                                                                                             |
|                        | 224. Rot. Tawn type 2 (90°) |                                                                                                                                                                                                                                                                                                                                                                             |
|                        |                             |                                                                                                                                                                                                                                                                                                                                                                             |
|                        |                             |                                                                                                                                                                                                                                                                                                                                                                             |
|                        |                             |                                                                                                                                                                                                                                                                                                                                                                             |
|                        |                             |                                                                                                                                                                                                                                                                                                                                                                             |

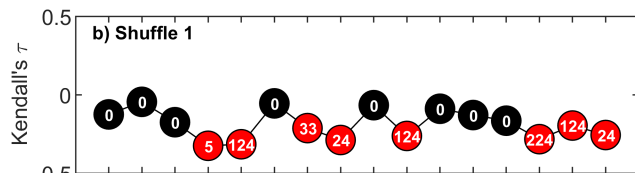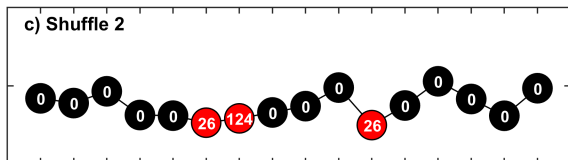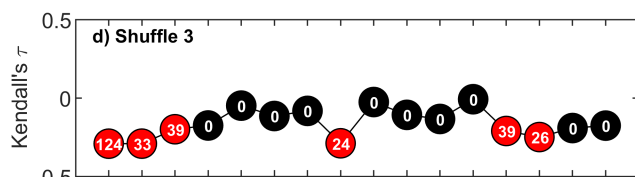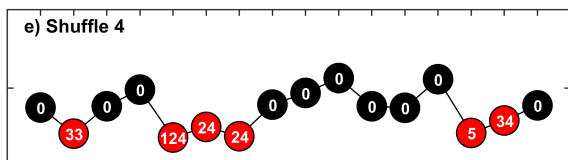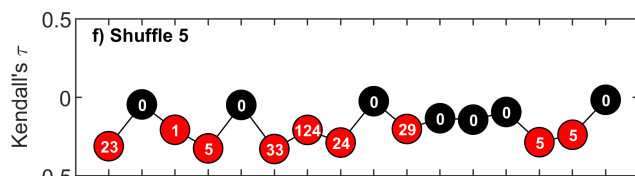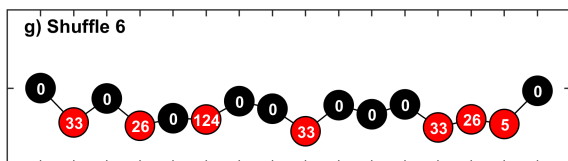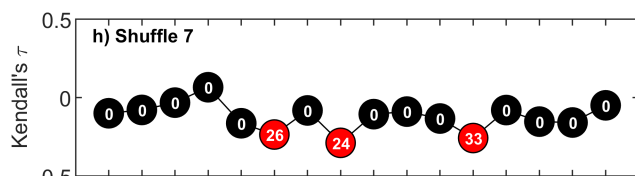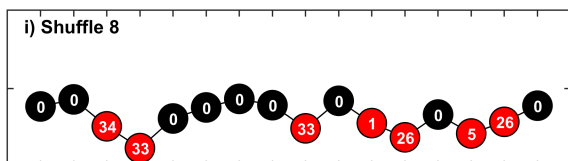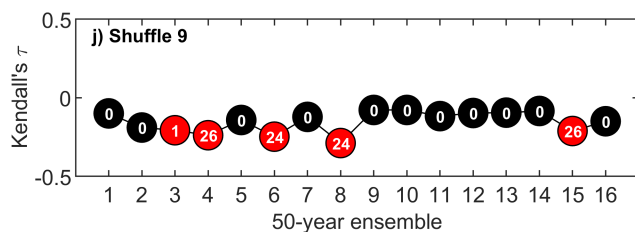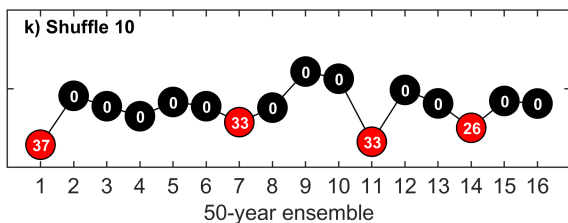

Supplement: Supplementary file 3 [file hess-2020-536-supplement.zip › Supplementary Material/S9.pdf]
