# Supplementary material for: Multivariate statistical modelling of extreme coastal water levels andthe effect of climate variability: a case study in the Netherlands
Source: Copernicus journal article supplement (doi:10.5194/hess-2020-536), 2020-10-27
Supplement: Supplementary file 3 [file hess-2020-536-supplement.zip]

Archive with 35 entries (33 files):
- Supplementary Material/
- Supplementary Material/S1/
- Supplementary Material/S1/Scatter_AB_dep_-0.1.pdf
- Supplementary Material/S1/Scatter_AB_dep_-0.2.pdf
- Supplementary Material/S1/Scatter_AB_dep_-0.3.pdf
- Supplementary Material/S1/Scatter_AB_dep_-0.4.pdf
- Supplementary Material/S1/Scatter_AB_dep_-0.5.pdf
- Supplementary Material/S1/Scatter_AB_dep_-0.6.pdf
- Supplementary Material/S1/Scatter_AB_dep_-0.7.pdf
- Supplementary Material/S1/Scatter_AB_dep_-0.8.pdf
- Supplementary Material/S1/Scatter_AB_dep_-0.9.pdf
- Supplementary Material/S1/Scatter_AB_dep_0.1.pdf
- Supplementary Material/S1/Scatter_AB_dep_0.2.pdf
- Supplementary Material/S1/Scatter_AB_dep_0.3.pdf
- Supplementary Material/S1/Scatter_AB_dep_0.4.pdf
- Supplementary Material/S1/Scatter_AB_dep_0.5.pdf
- Supplementary Material/S1/Scatter_AB_dep_0.6.pdf
- Supplementary Material/S1/Scatter_AB_dep_0.7.pdf
- Supplementary Material/S1/Scatter_AB_dep_0.8.pdf
- Supplementary Material/S1/Scatter_AB_dep_0.9.pdf
- Supplementary Material/S1/Scatter_AB_dep_0.pdf
- Supplementary Material/S10.pdf
- Supplementary Material/S11.pdf
- Supplementary Material/S12.pdf
- Supplementary Material/S13.pdf
- Supplementary Material/S14.pdf
- Supplementary Material/S2.png
- Supplementary Material/S3.png
- Supplementary Material/S4.png
- Supplementary Material/S5.png
- Supplementary Material/S6.pdf
- Supplementary Material/S7.pdf
- Supplementary Material/S8.pdf
- Supplementary Material/S9.pdf
- Supplementary Material/Supplementary_material.pdf
