# Supplementary figures and images for: Multivariate statistical modelling of extreme coastal water levels andthe effect of climate variability: a case study in the Netherlands
Source: Copernicus journal article supplement (doi:10.5194/hess-2020-536), 2020-10-27

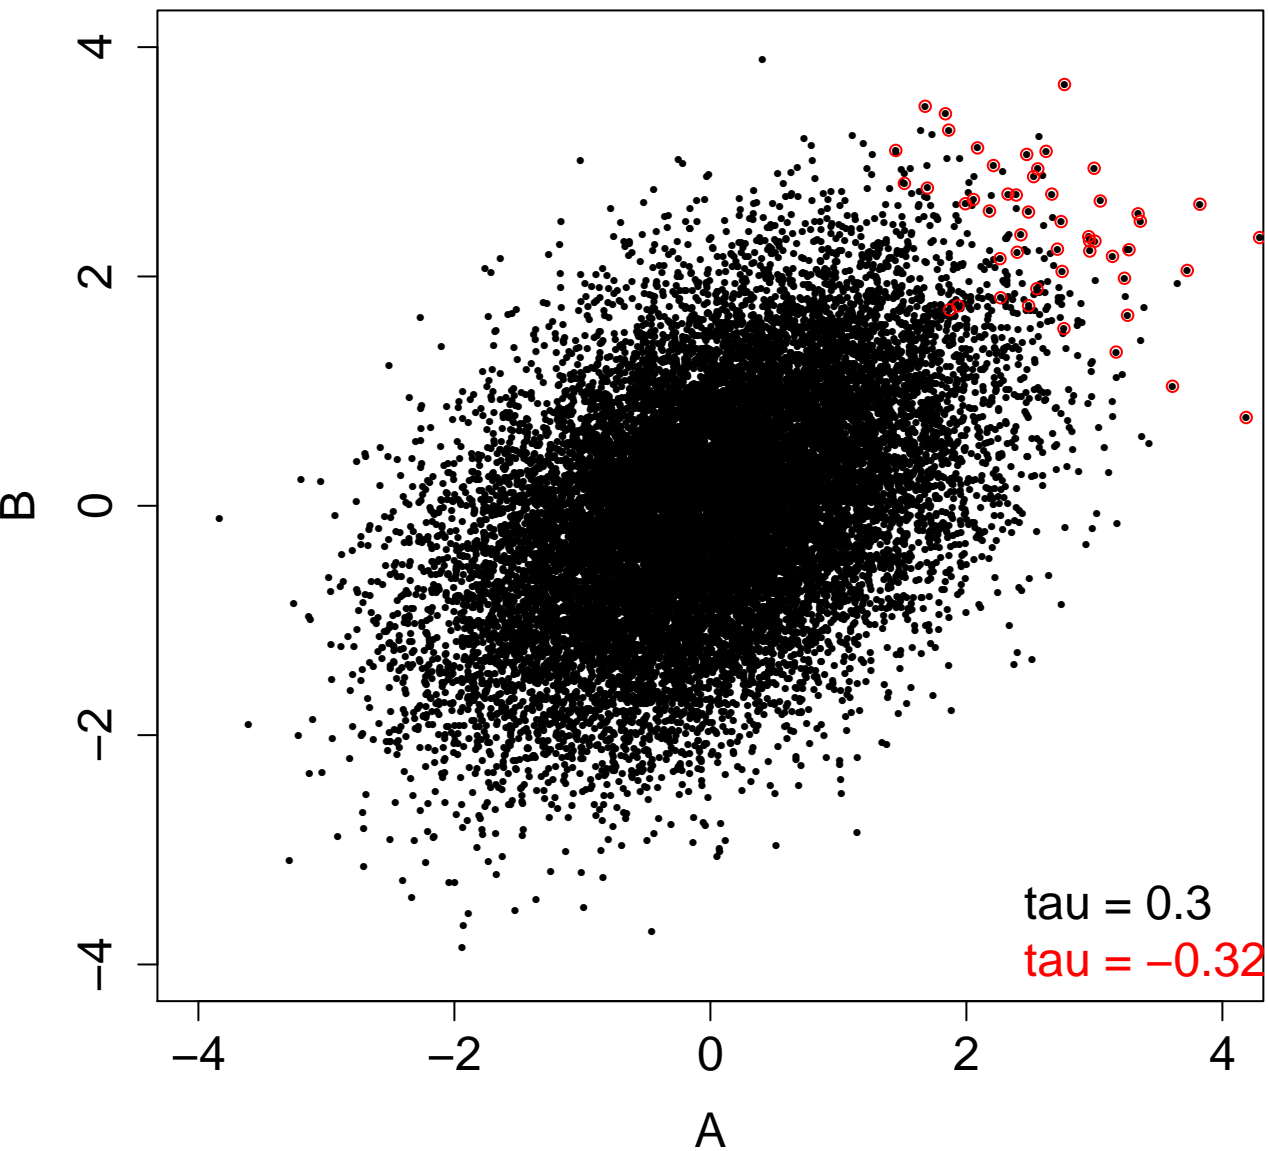

Supplement: Supplementary file 1 [file hess-2020-536-supplement.zip]

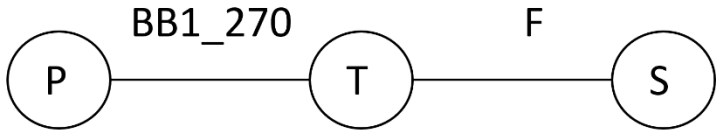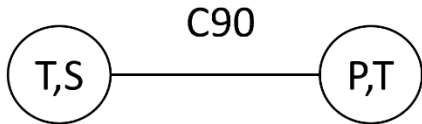

Supplement: Supplementary file 2 [file hess-2020-536-supplement.zip]

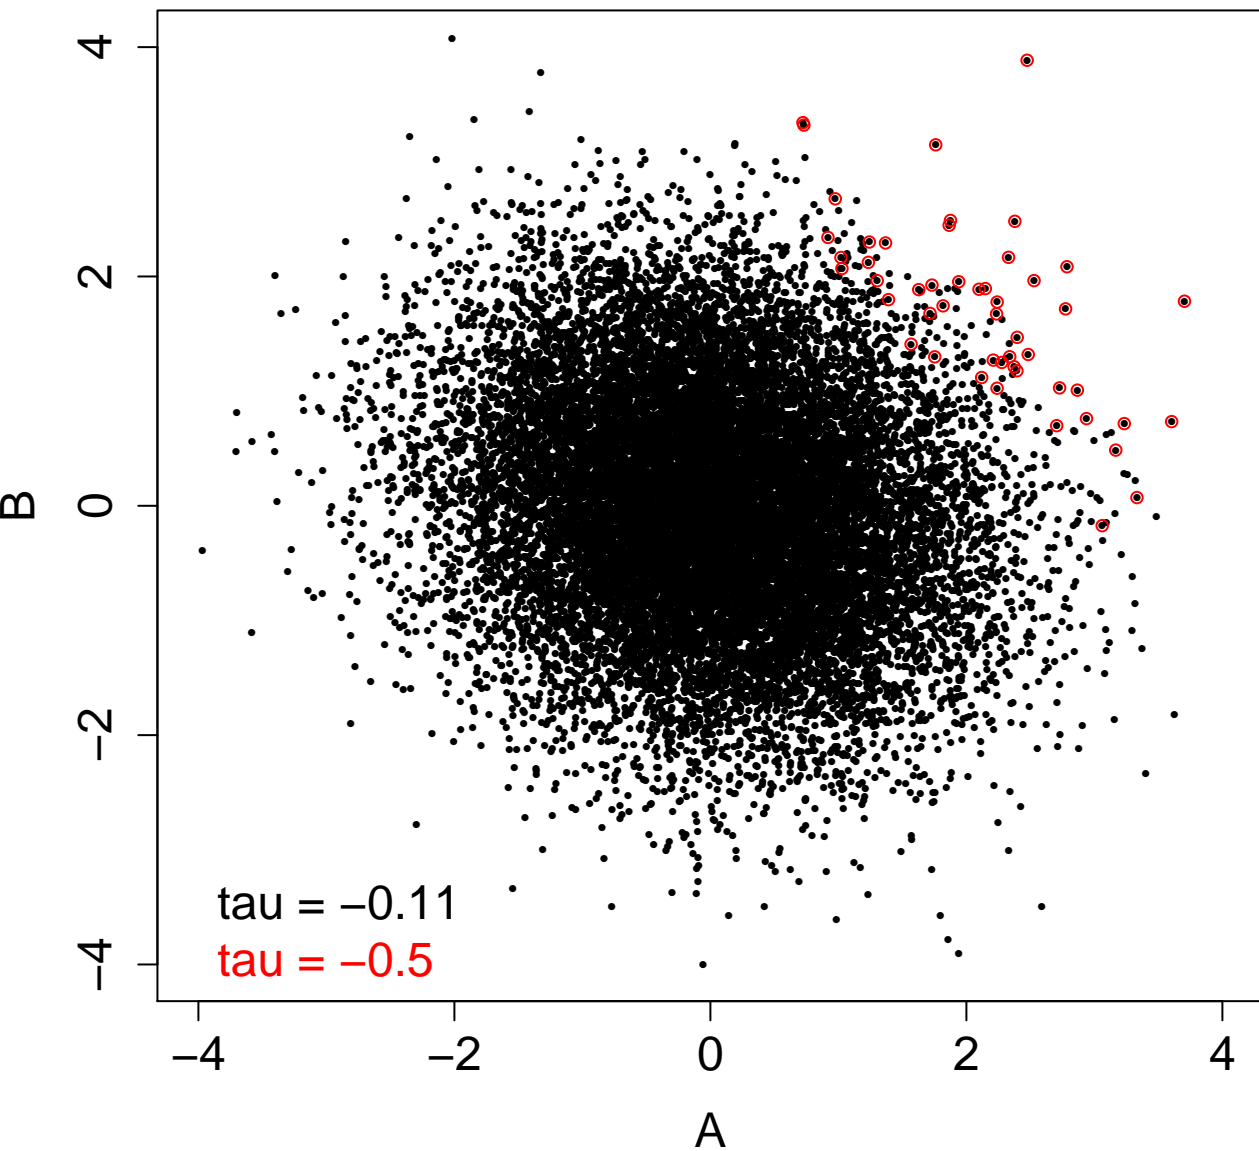

Supplement: Supplementary file 3 [file hess-2020-536-supplement.zip › Supplementary Material/S1/Scatter_AB_dep_-0.1.pdf]

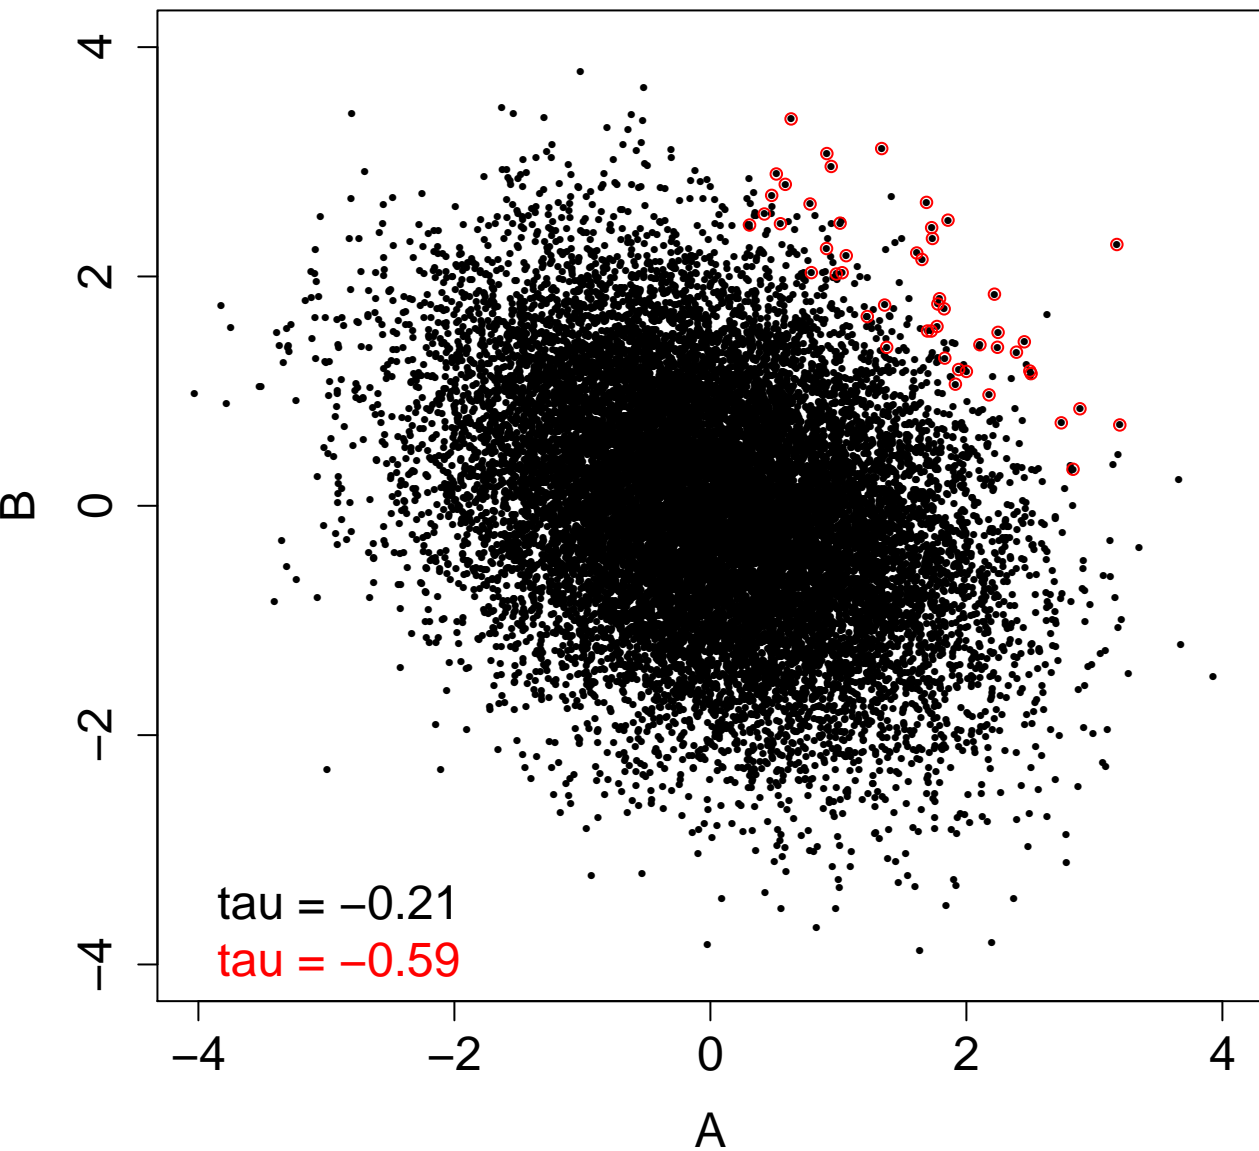

Supplement: Supplementary file 3 [file hess-2020-536-supplement.zip › Supplementary Material/S1/Scatter_AB_dep_-0.2.pdf]

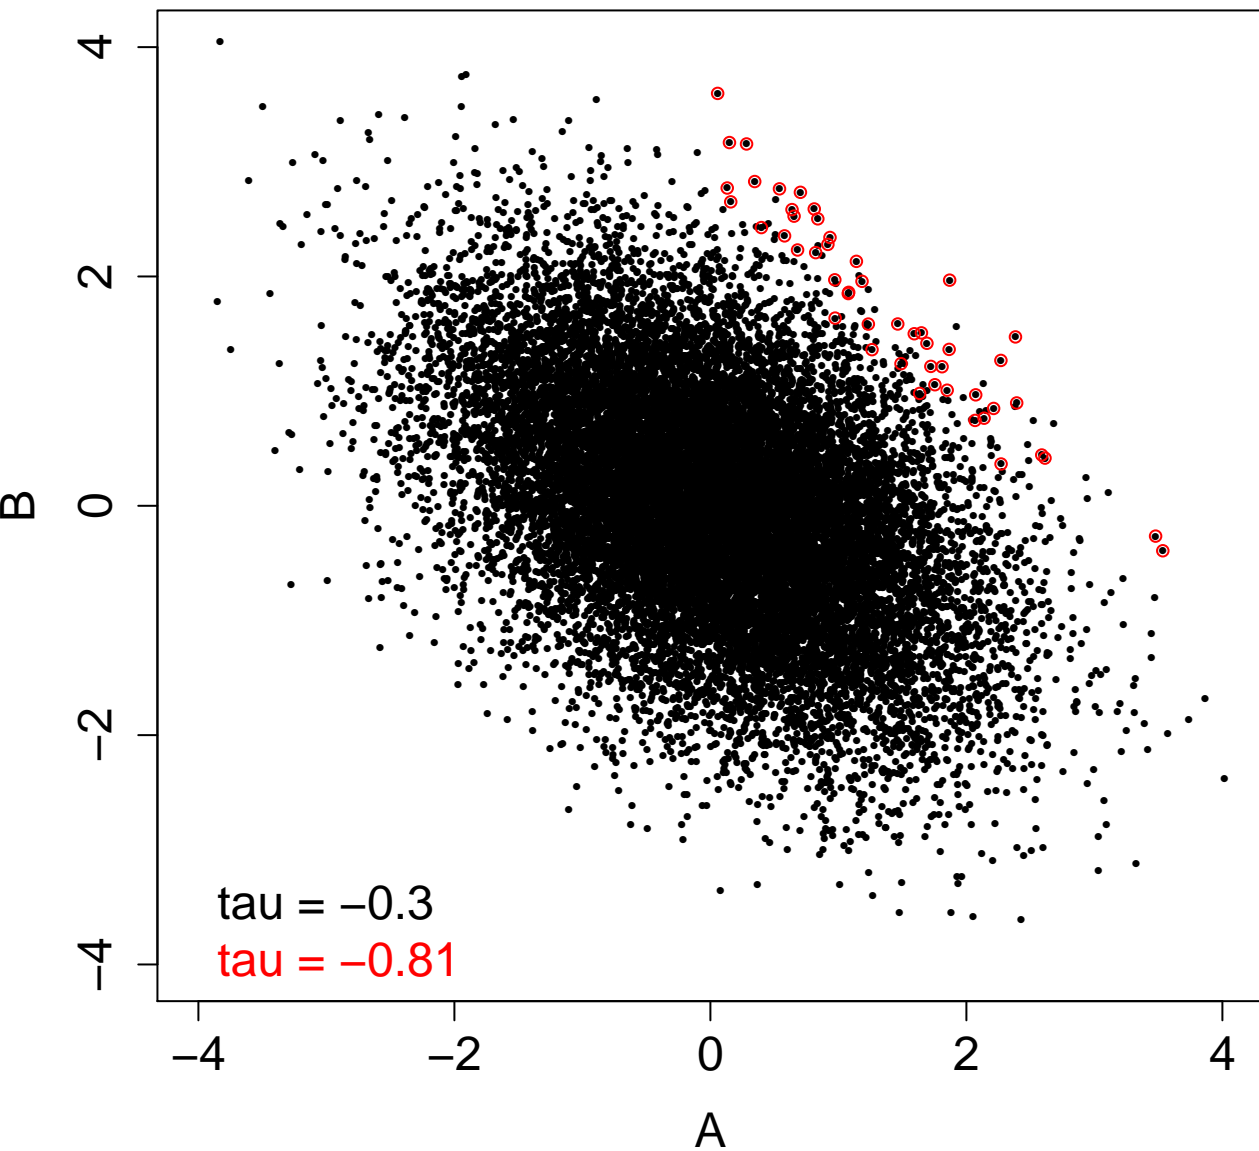

Supplement: Supplementary file 3 [file hess-2020-536-supplement.zip › Supplementary Material/S1/Scatter_AB_dep_-0.3.pdf]

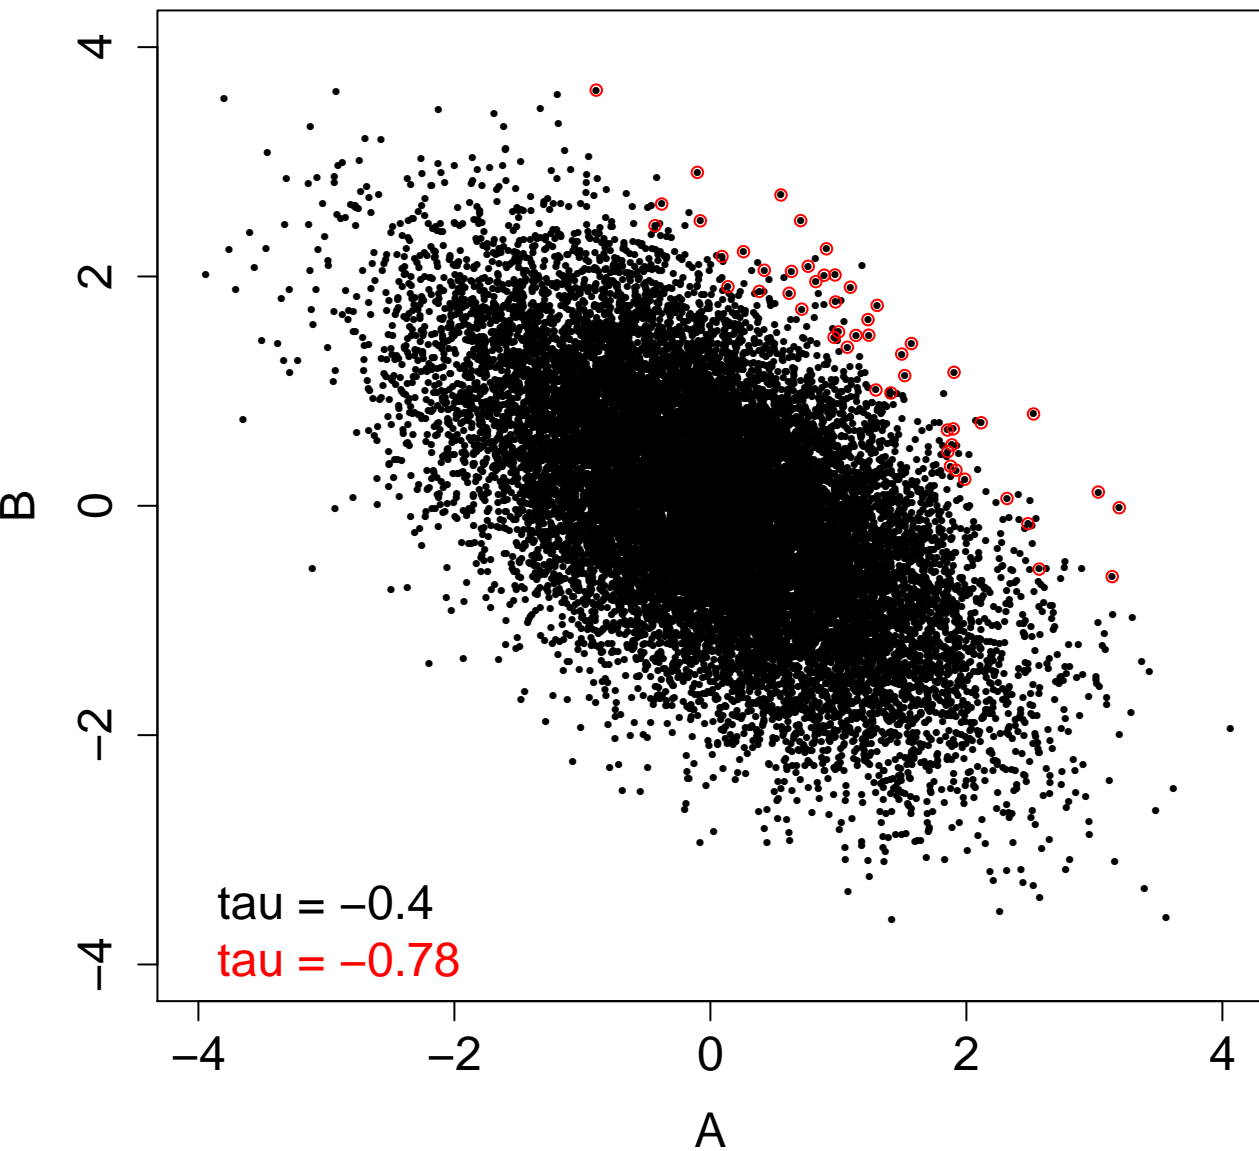

Supplement: Supplementary file 3 [file hess-2020-536-supplement.zip › Supplementary Material/S1/Scatter_AB_dep_-0.4.pdf]

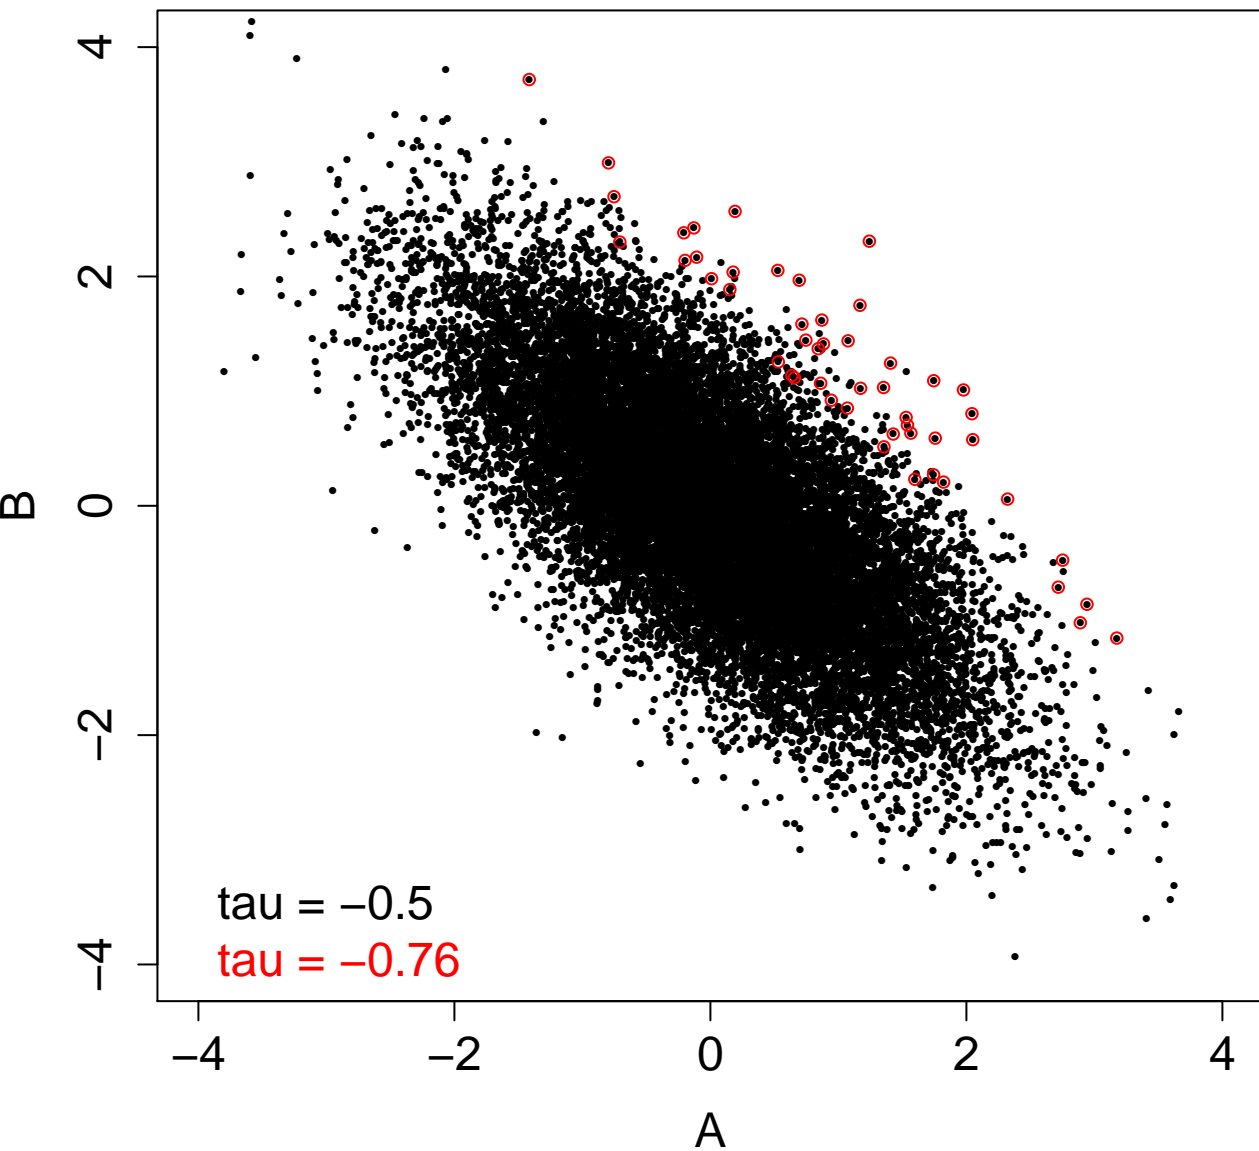

Supplement: Supplementary file 3 [file hess-2020-536-supplement.zip › Supplementary Material/S1/Scatter_AB_dep_-0.5.pdf]

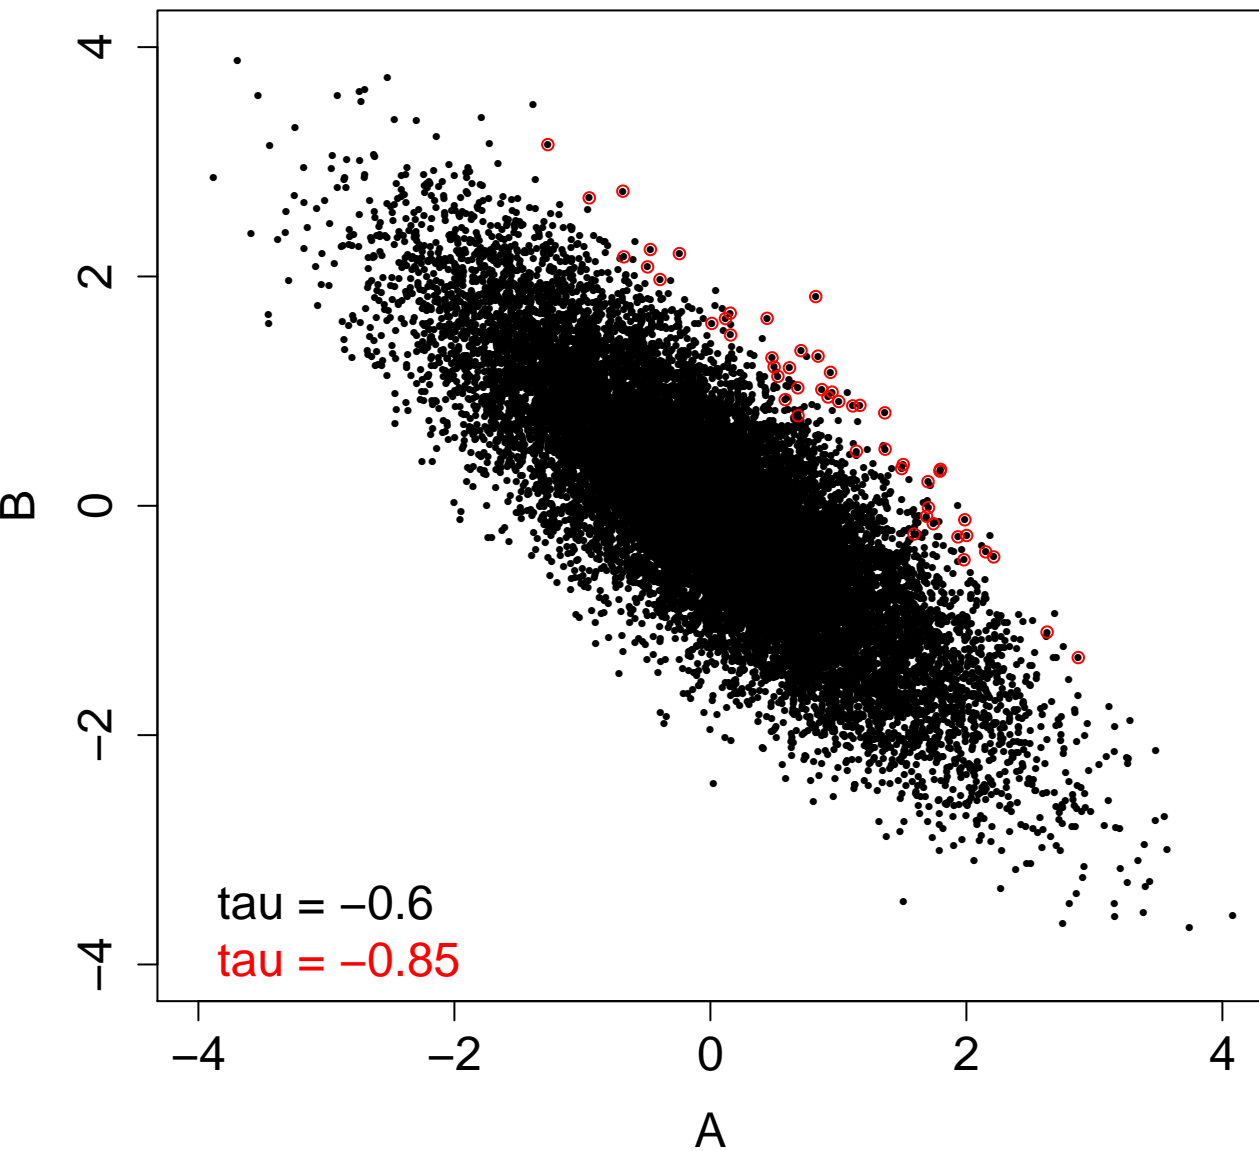

Supplement: Supplementary file 3 [file hess-2020-536-supplement.zip › Supplementary Material/S1/Scatter_AB_dep_-0.6.pdf]

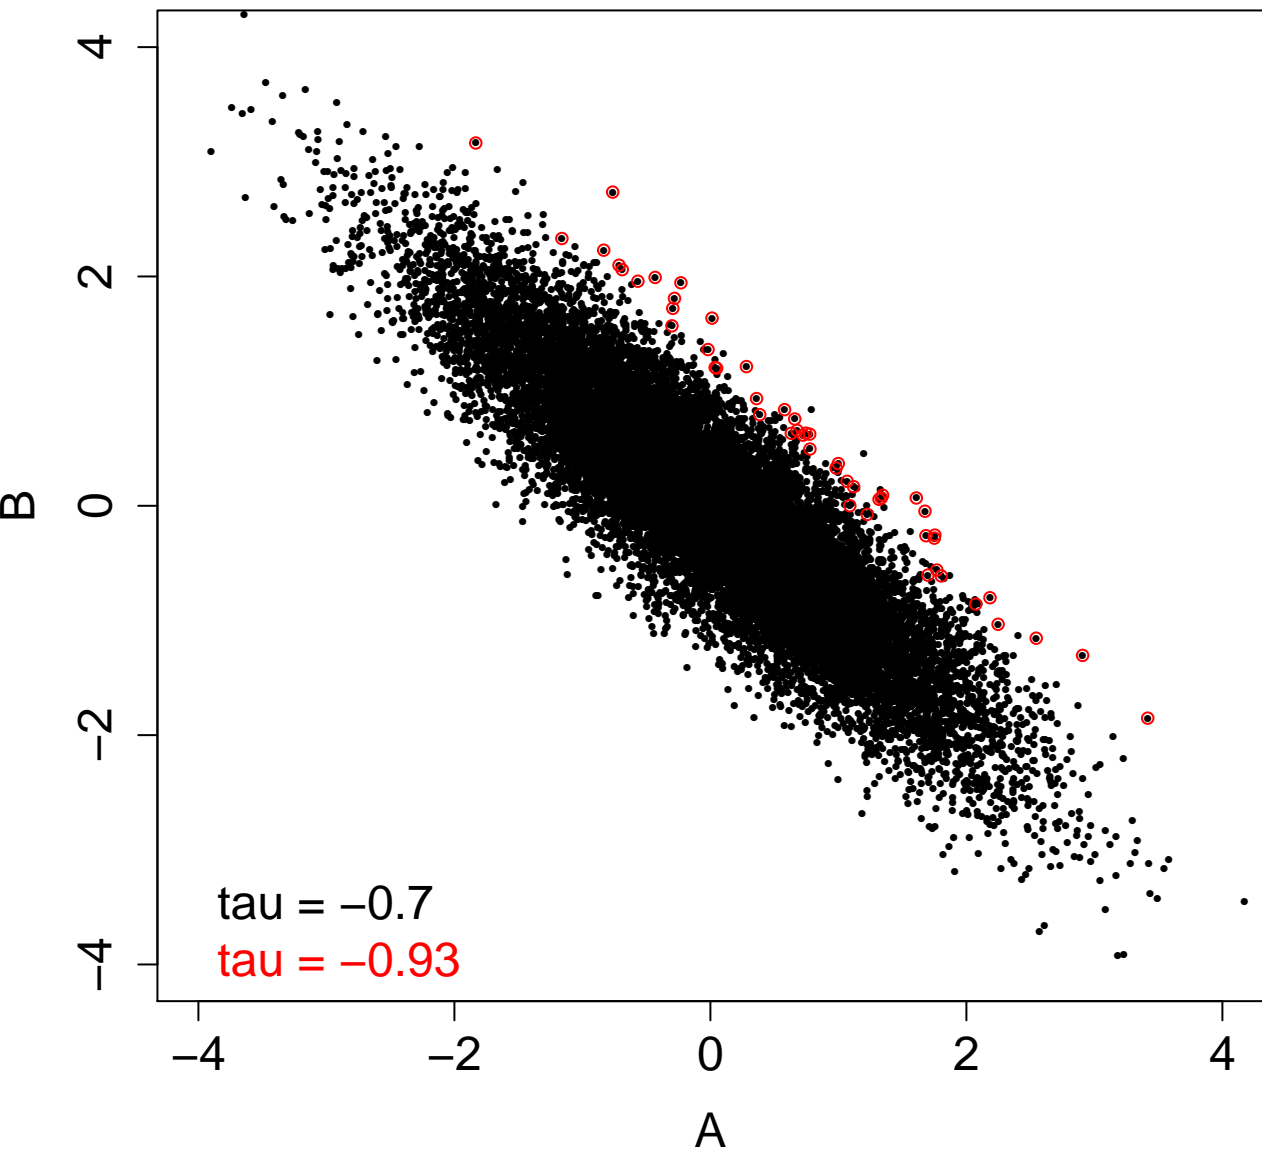

Supplement: Supplementary file 3 [file hess-2020-536-supplement.zip › Supplementary Material/S1/Scatter_AB_dep_-0.7.pdf]

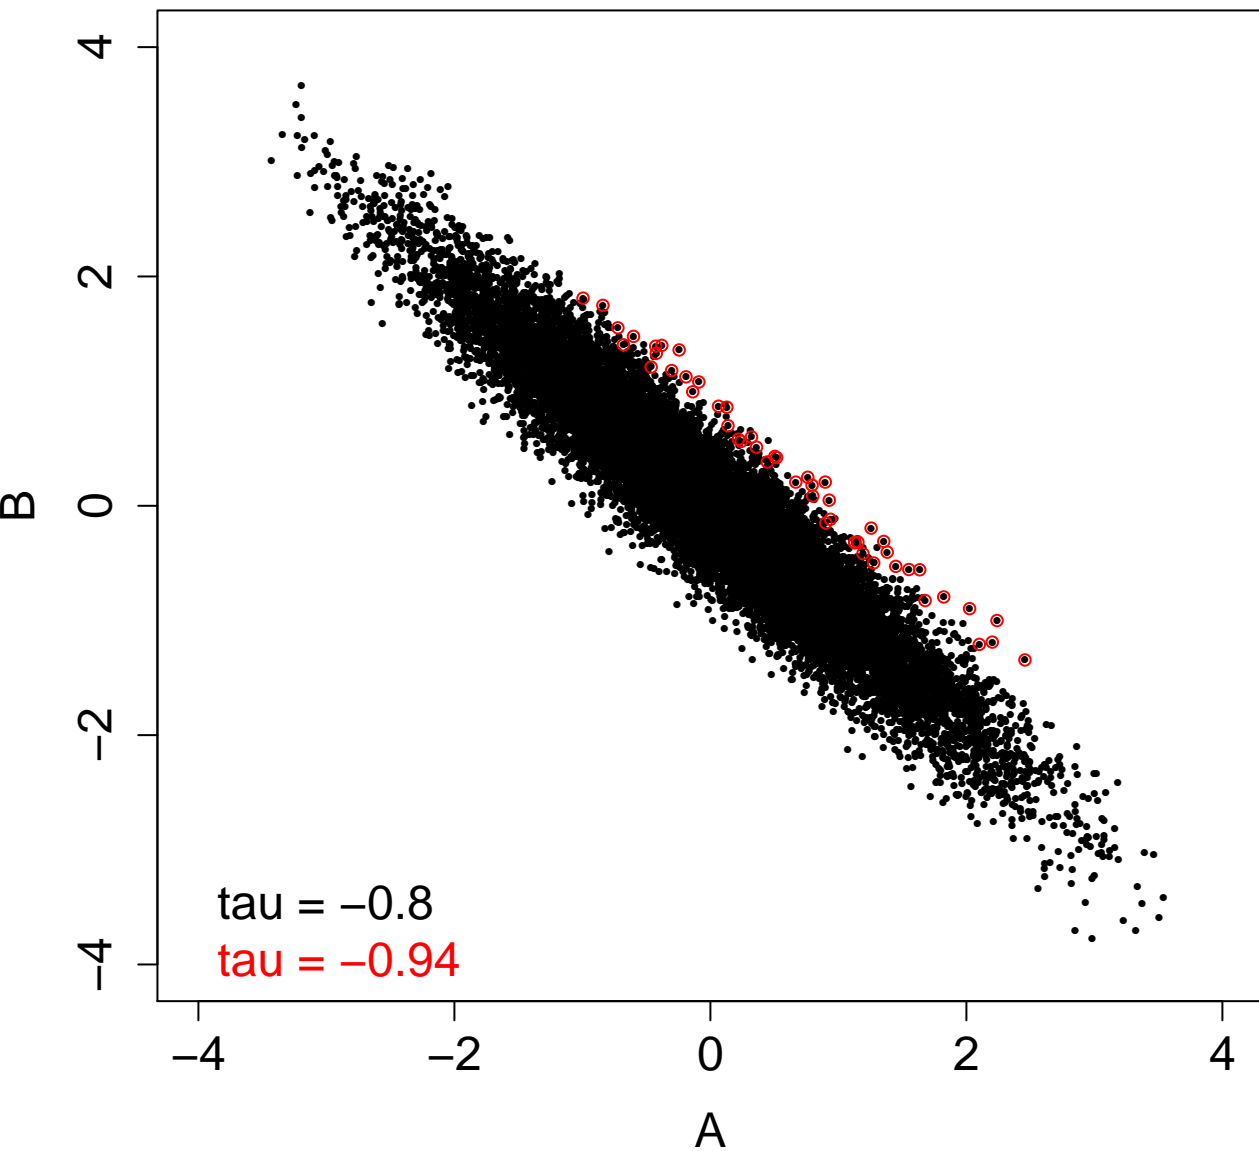

Supplement: Supplementary file 3 [file hess-2020-536-supplement.zip › Supplementary Material/S1/Scatter_AB_dep_-0.8.pdf]

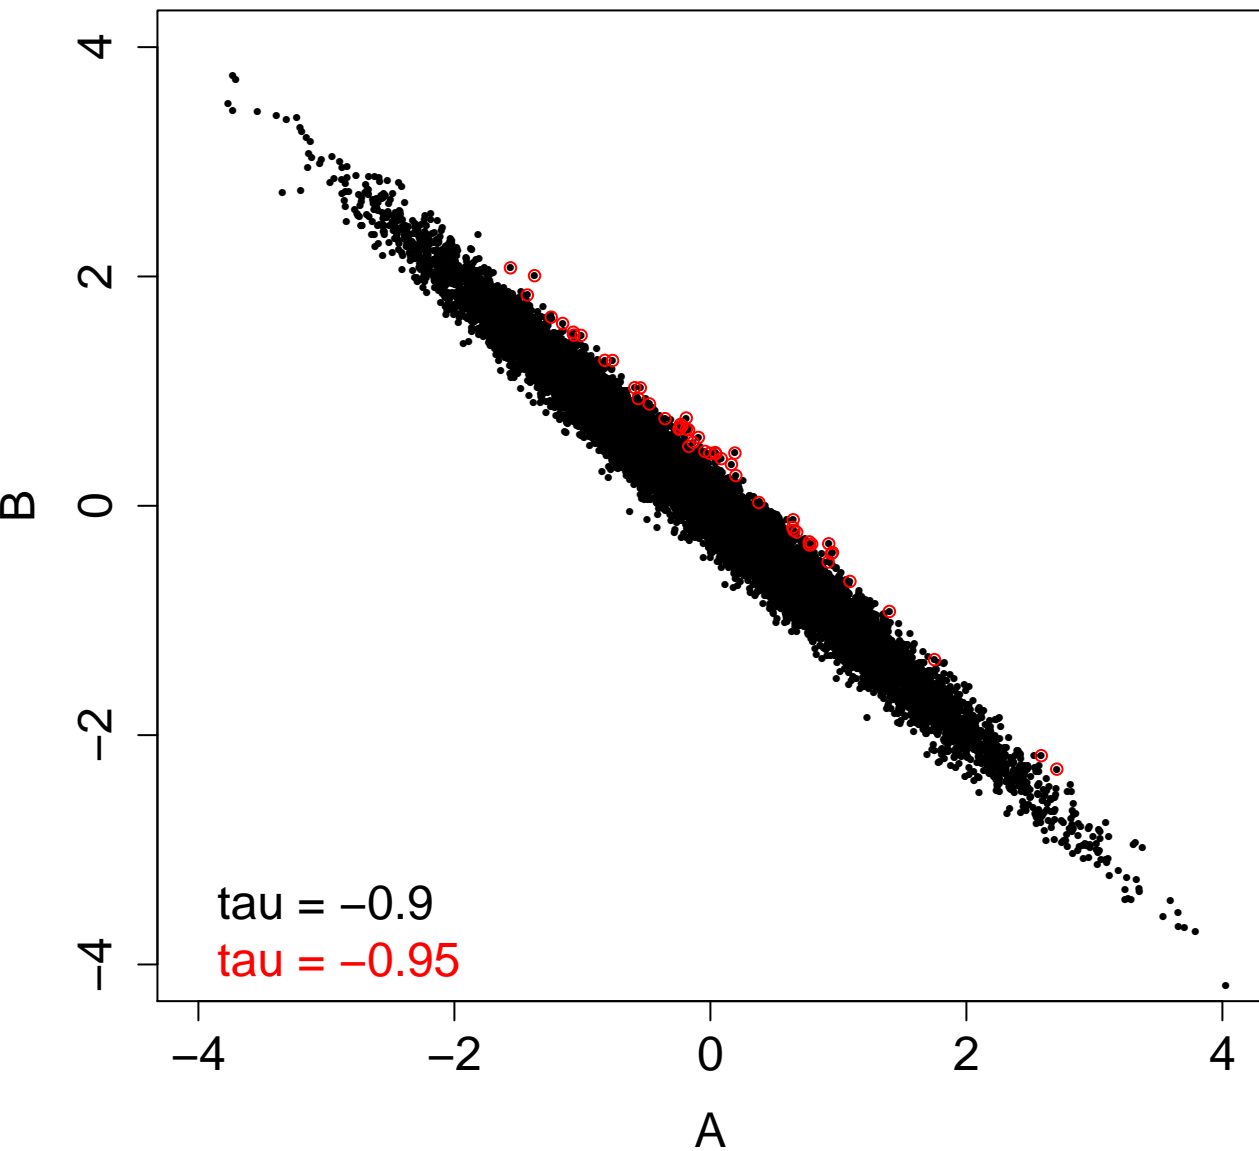

Supplement: Supplementary file 3 [file hess-2020-536-supplement.zip › Supplementary Material/S1/Scatter_AB_dep_-0.9.pdf]

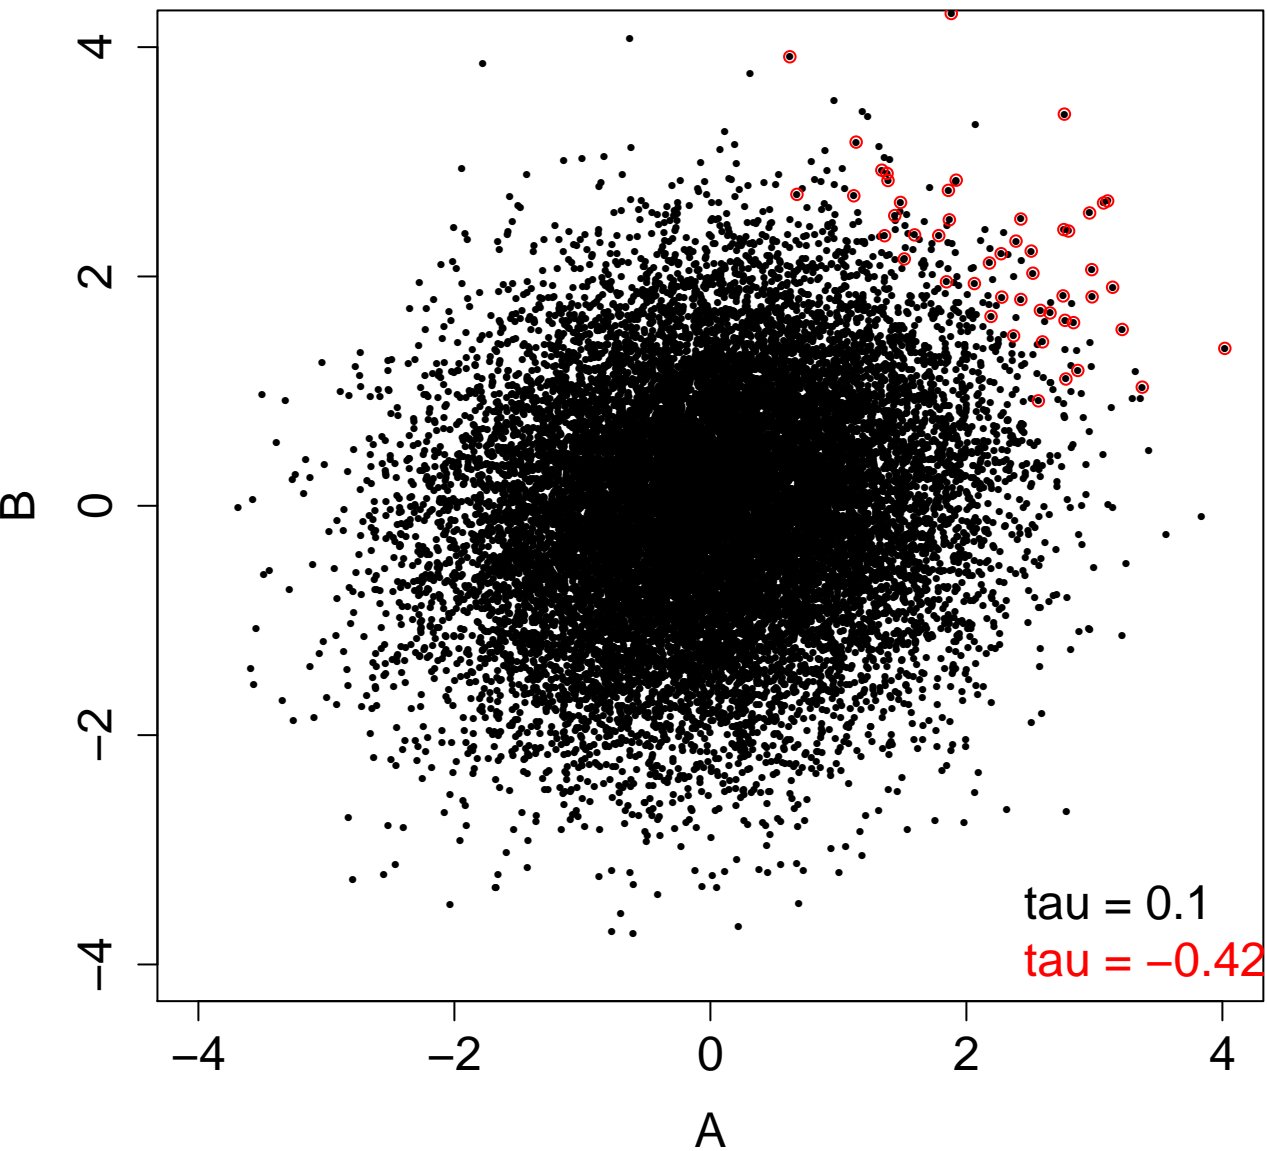

Supplement: Supplementary file 3 [file hess-2020-536-supplement.zip › Supplementary Material/S1/Scatter_AB_dep_0.1.pdf]

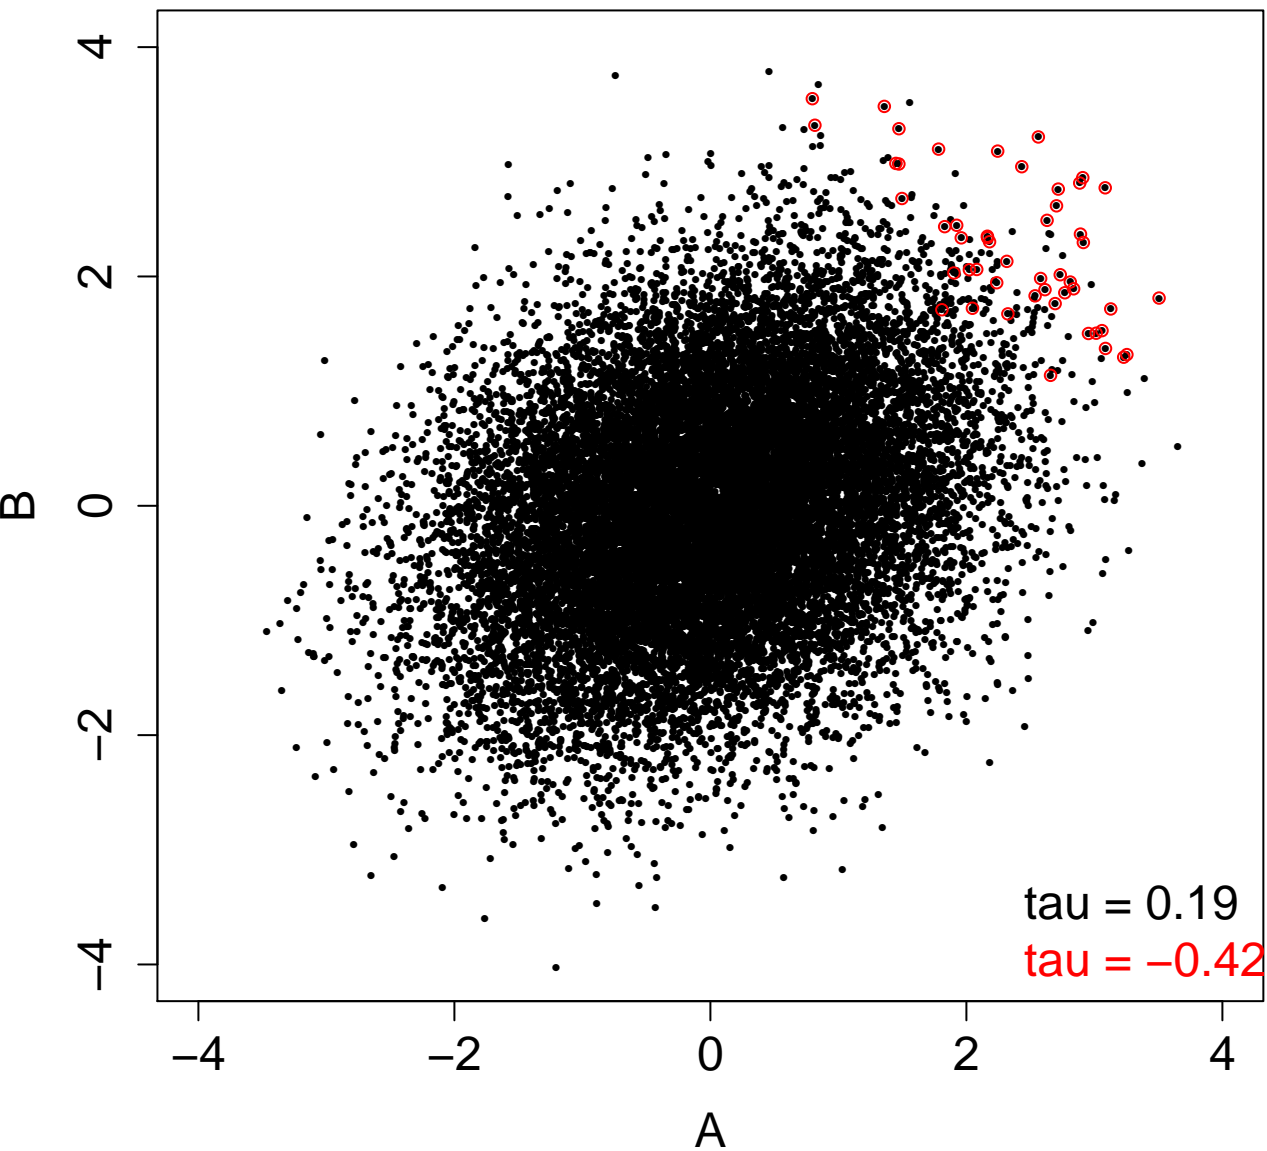

Supplement: Supplementary file 3 [file hess-2020-536-supplement.zip › Supplementary Material/S1/Scatter_AB_dep_0.2.pdf]

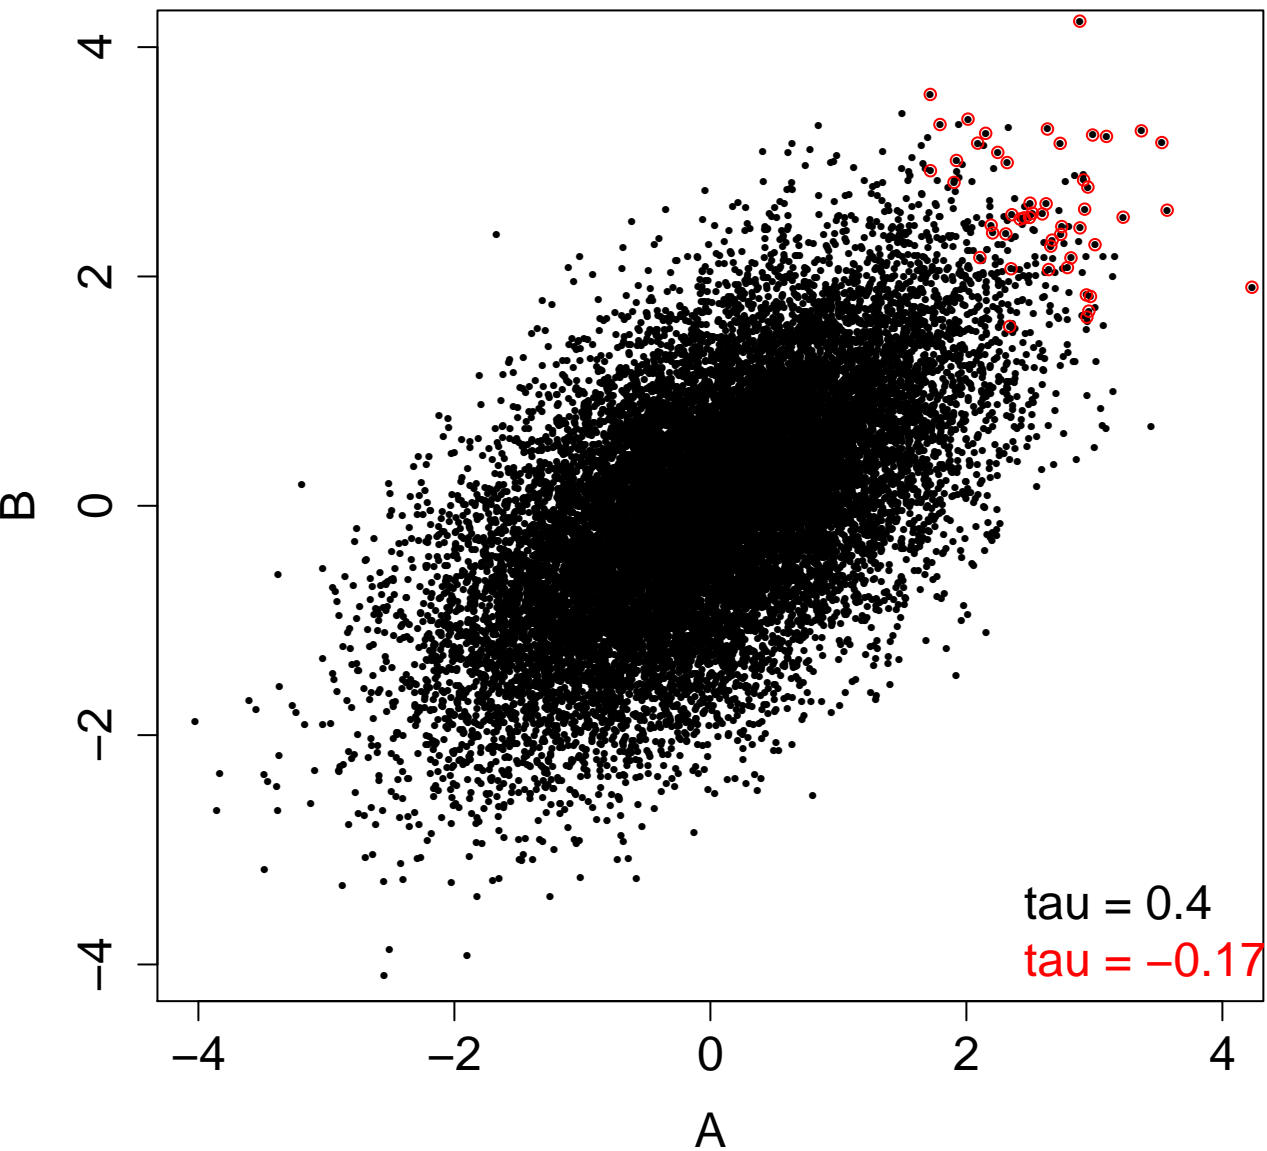

Supplement: Supplementary file 3 [file hess-2020-536-supplement.zip › Supplementary Material/S1/Scatter_AB_dep_0.4.pdf]

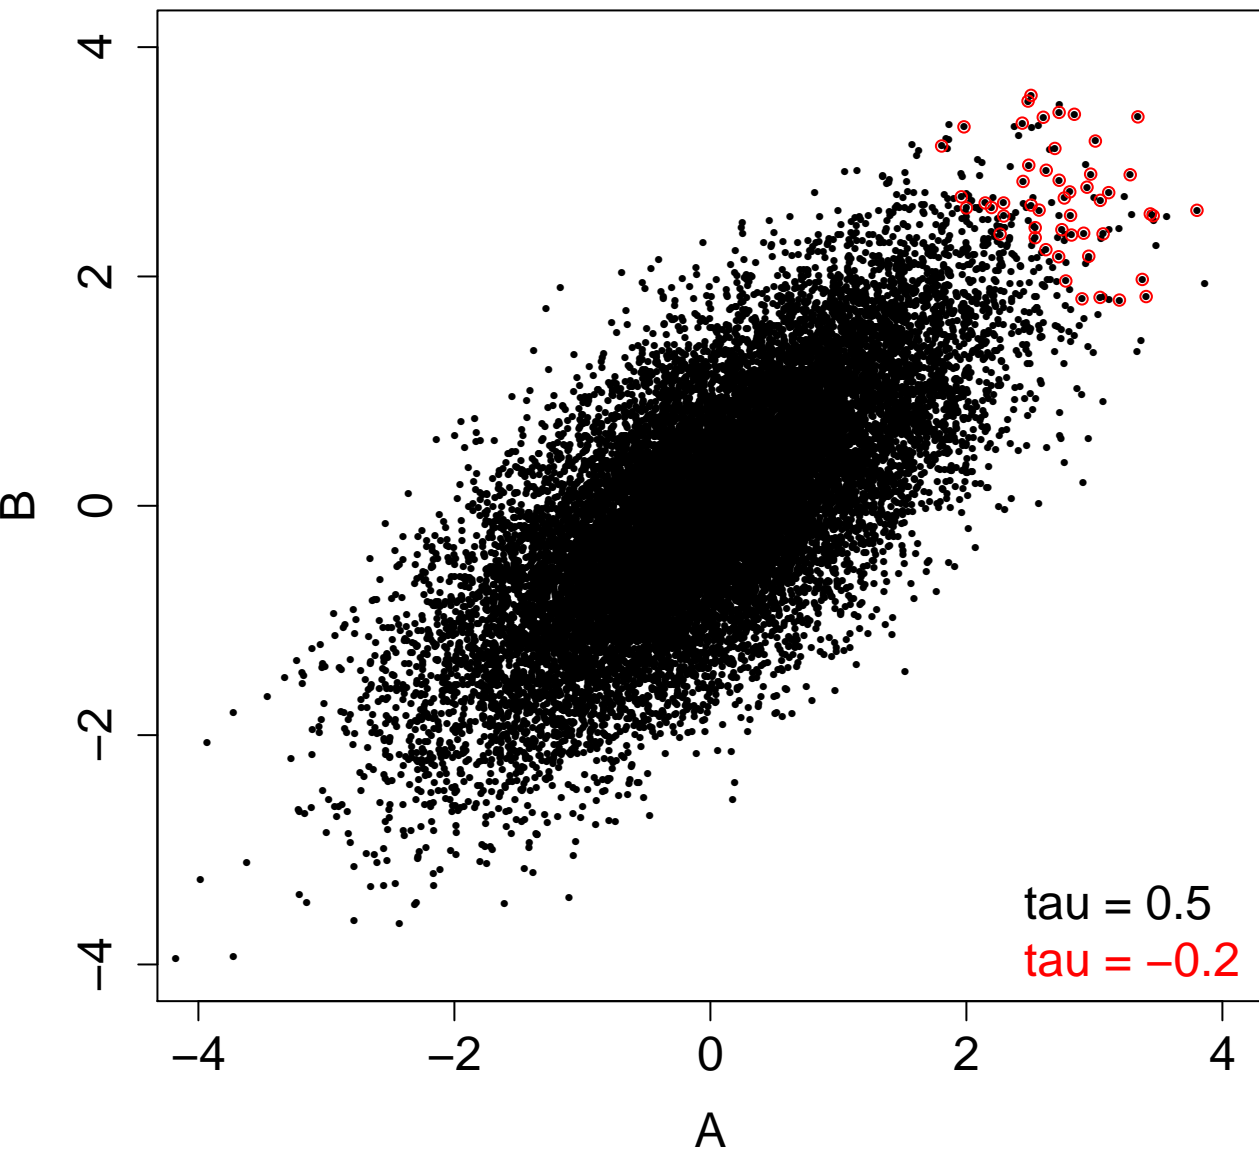

Supplement: Supplementary file 3 [file hess-2020-536-supplement.zip › Supplementary Material/S1/Scatter_AB_dep_0.5.pdf]

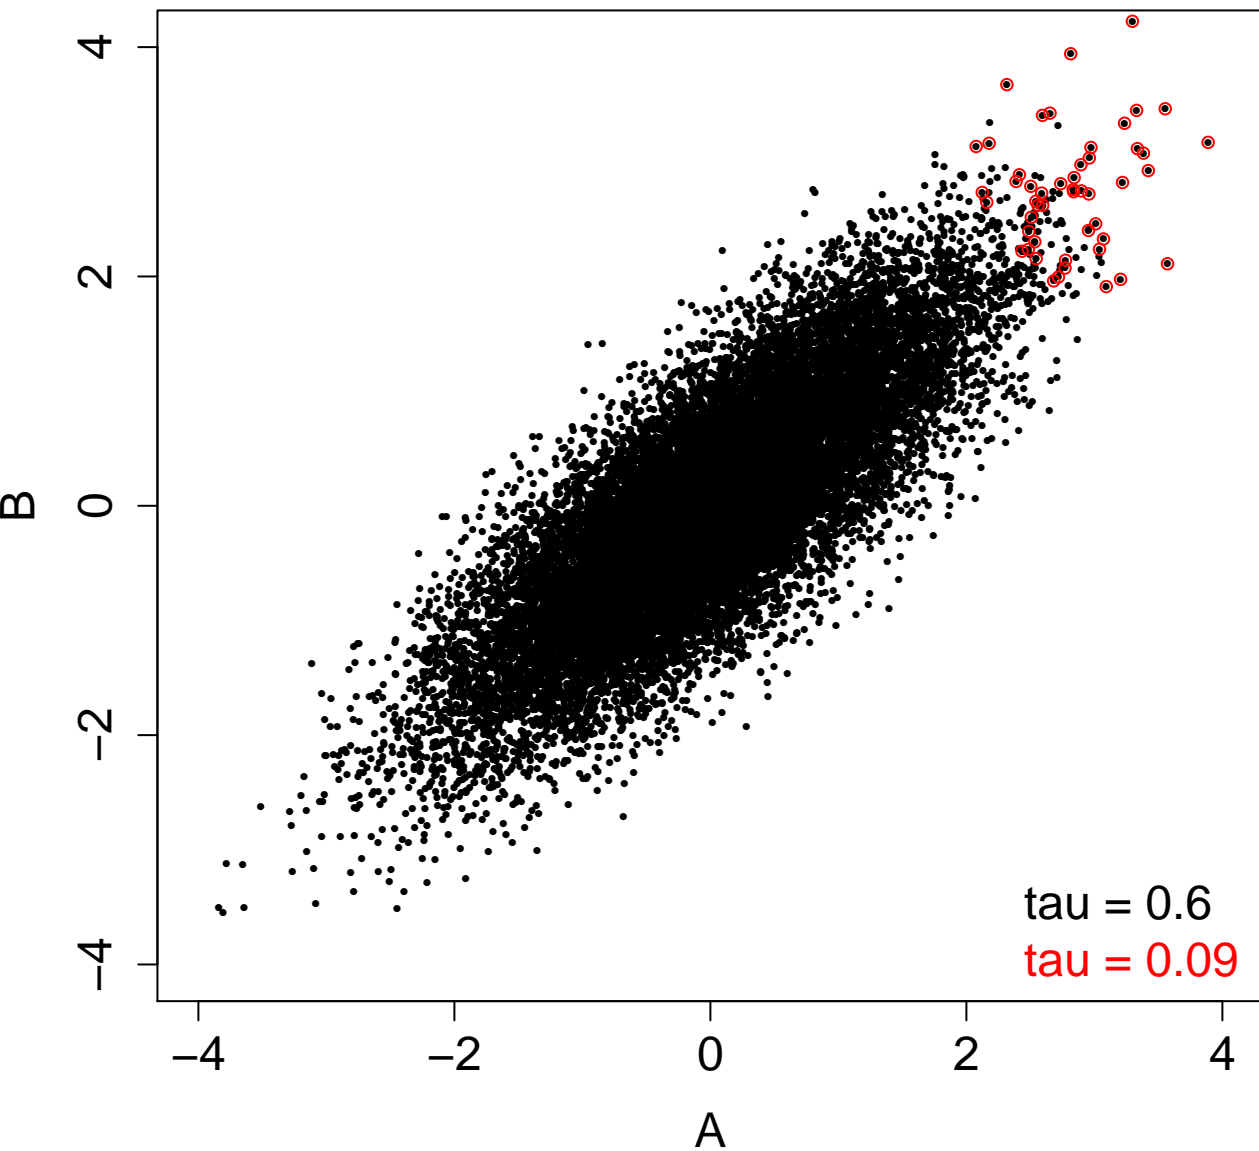

Supplement: Supplementary file 3 [file hess-2020-536-supplement.zip › Supplementary Material/S1/Scatter_AB_dep_0.6.pdf]

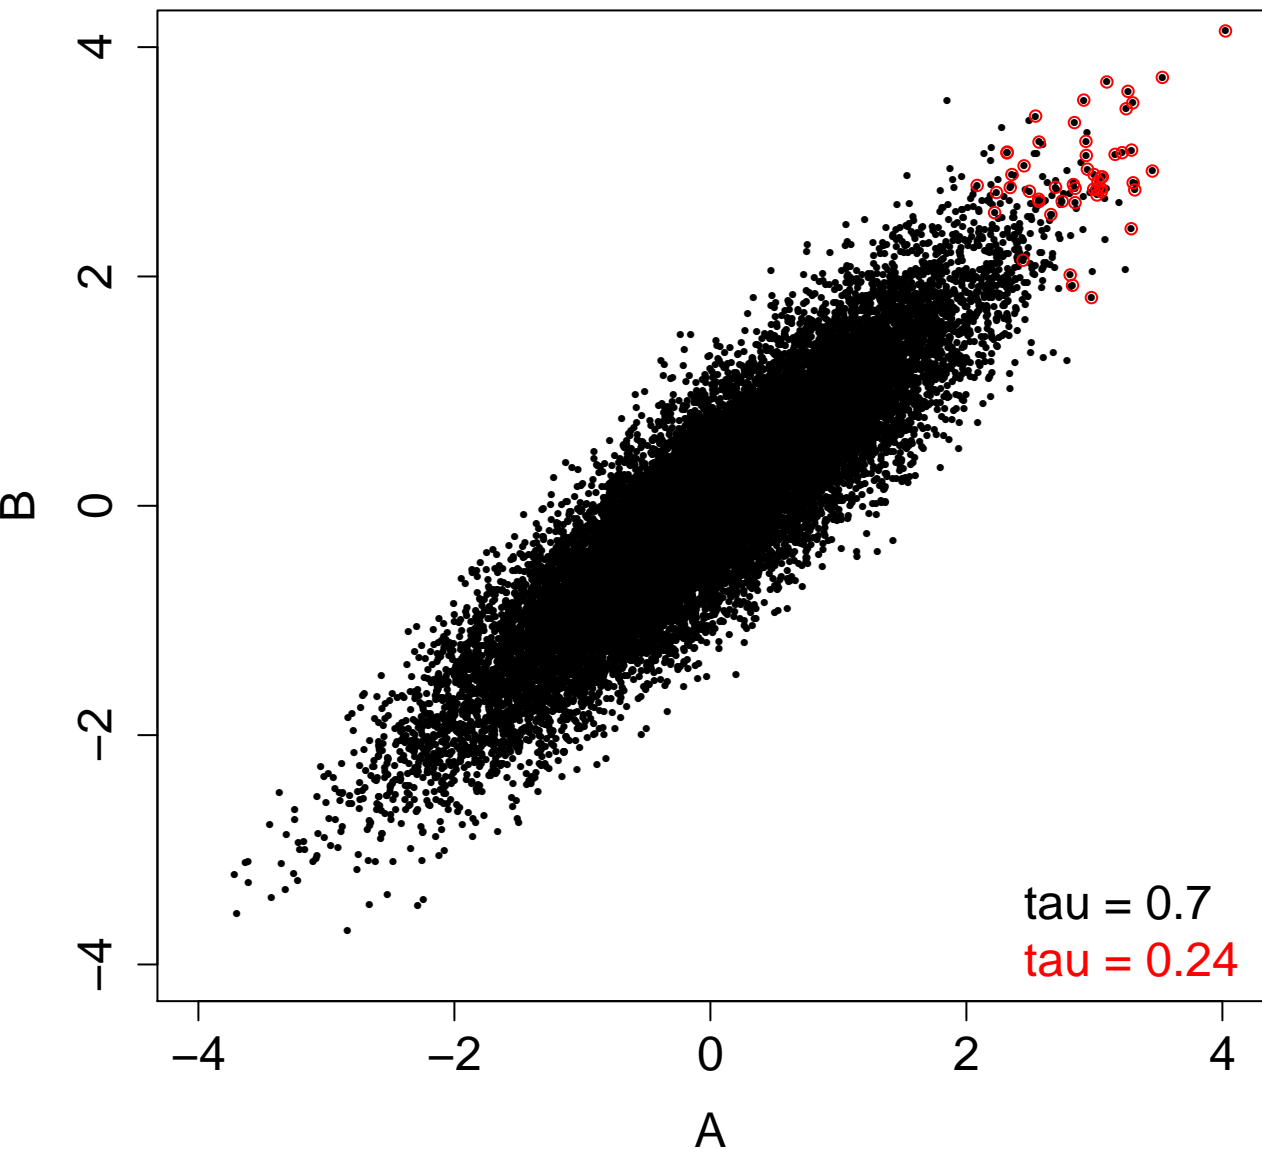

Supplement: Supplementary file 3 [file hess-2020-536-supplement.zip › Supplementary Material/S1/Scatter_AB_dep_0.7.pdf]

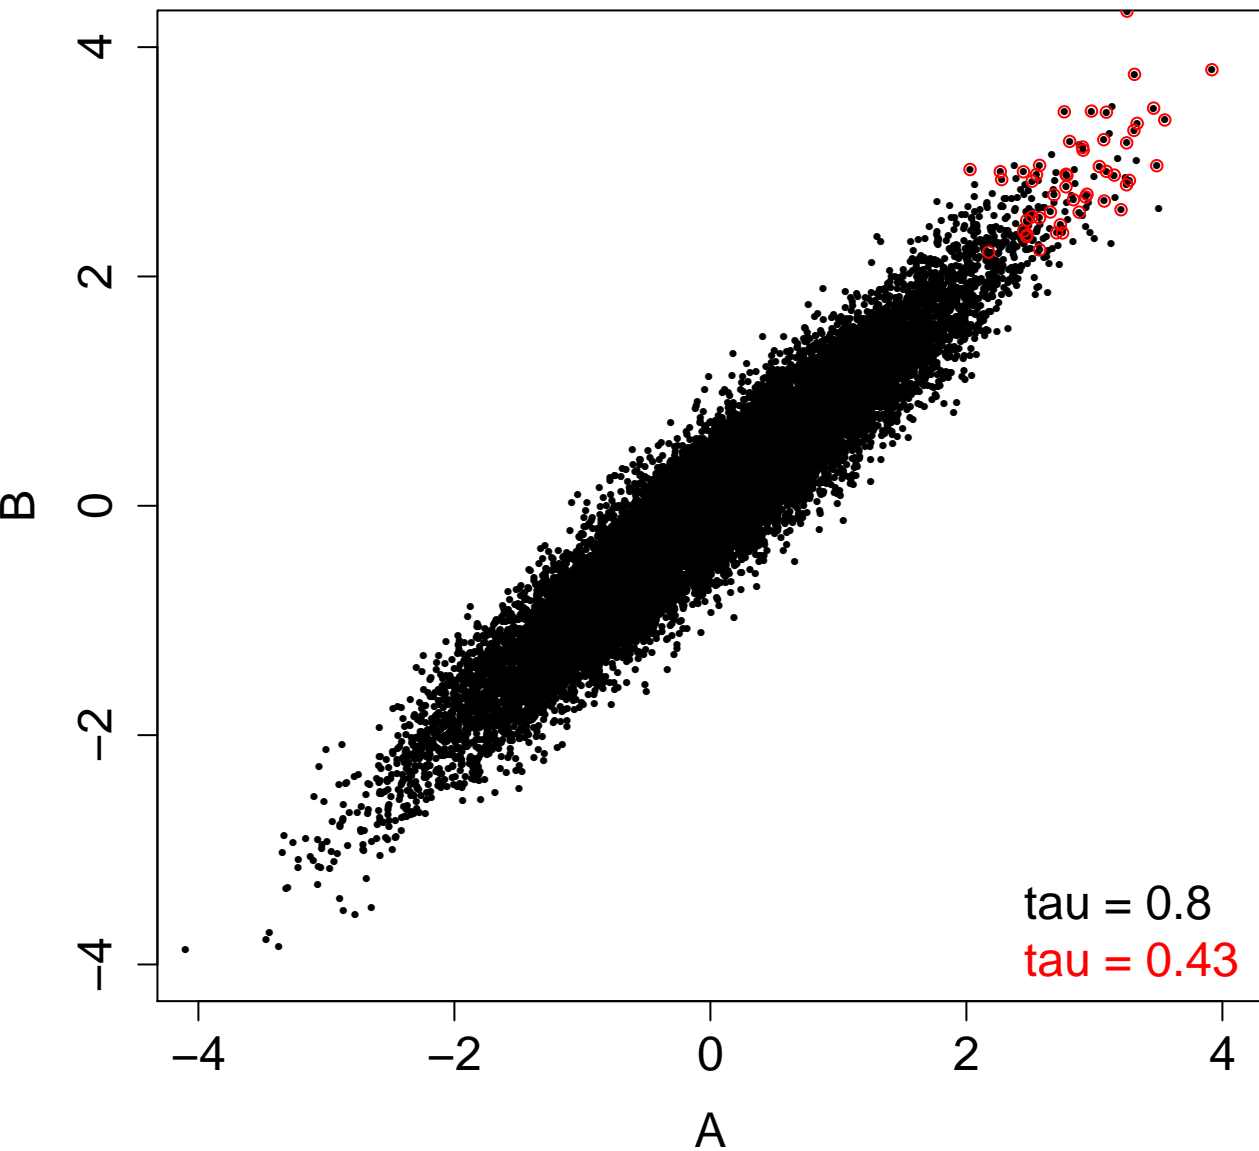

Supplement: Supplementary file 3 [file hess-2020-536-supplement.zip › Supplementary Material/S1/Scatter_AB_dep_0.8.pdf]

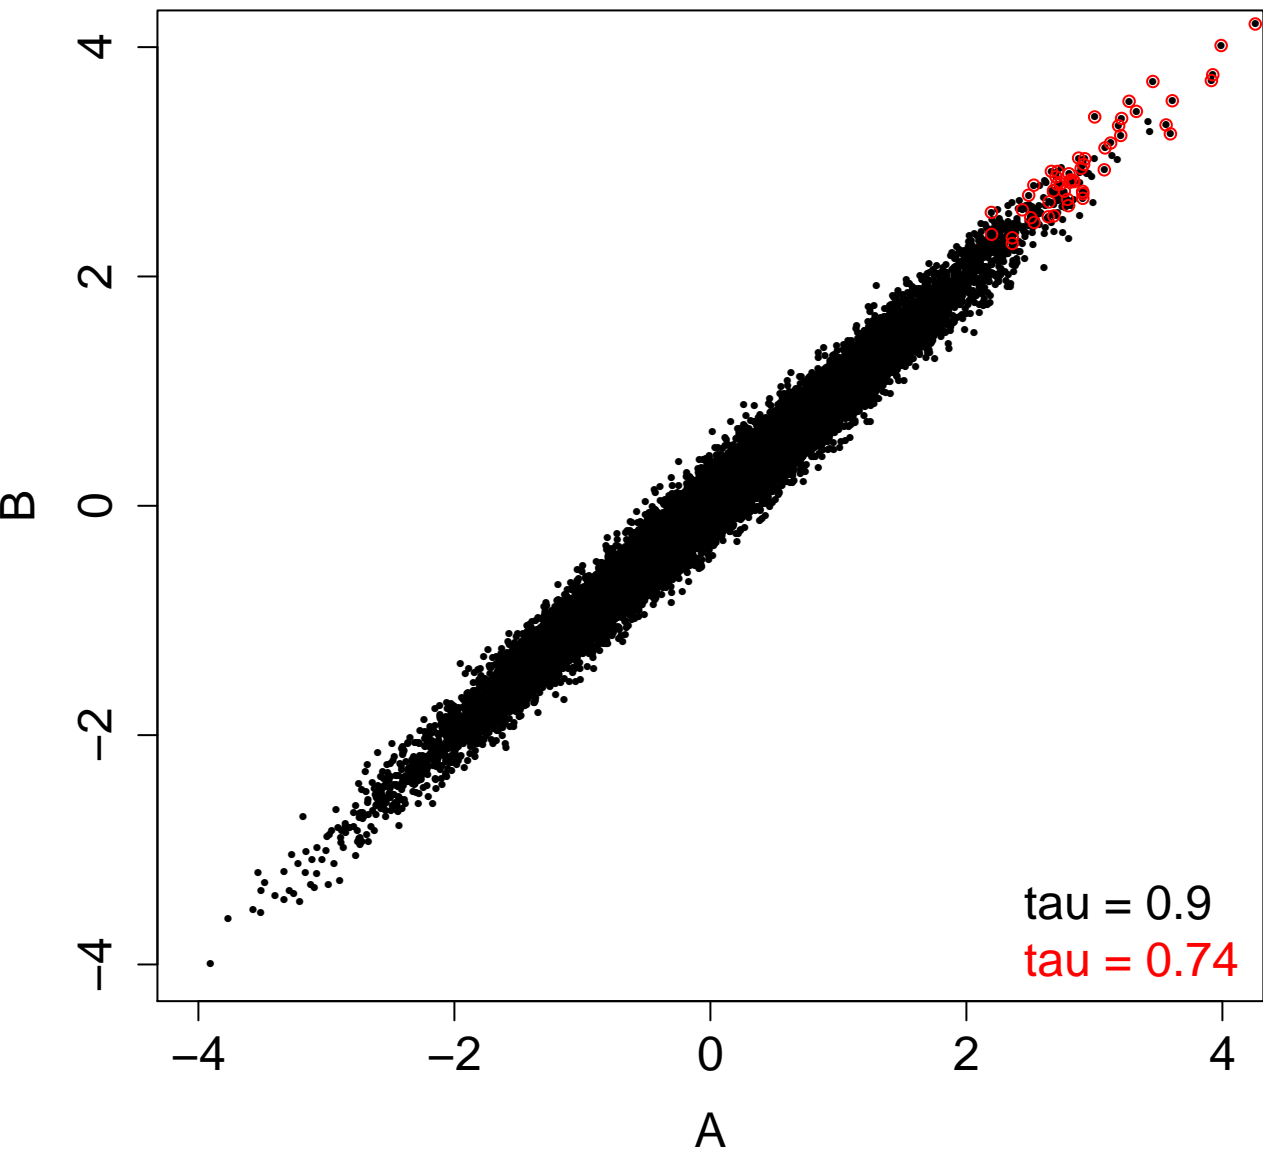

Supplement: Supplementary file 3 [file hess-2020-536-supplement.zip › Supplementary Material/S1/Scatter_AB_dep_0.9.pdf]

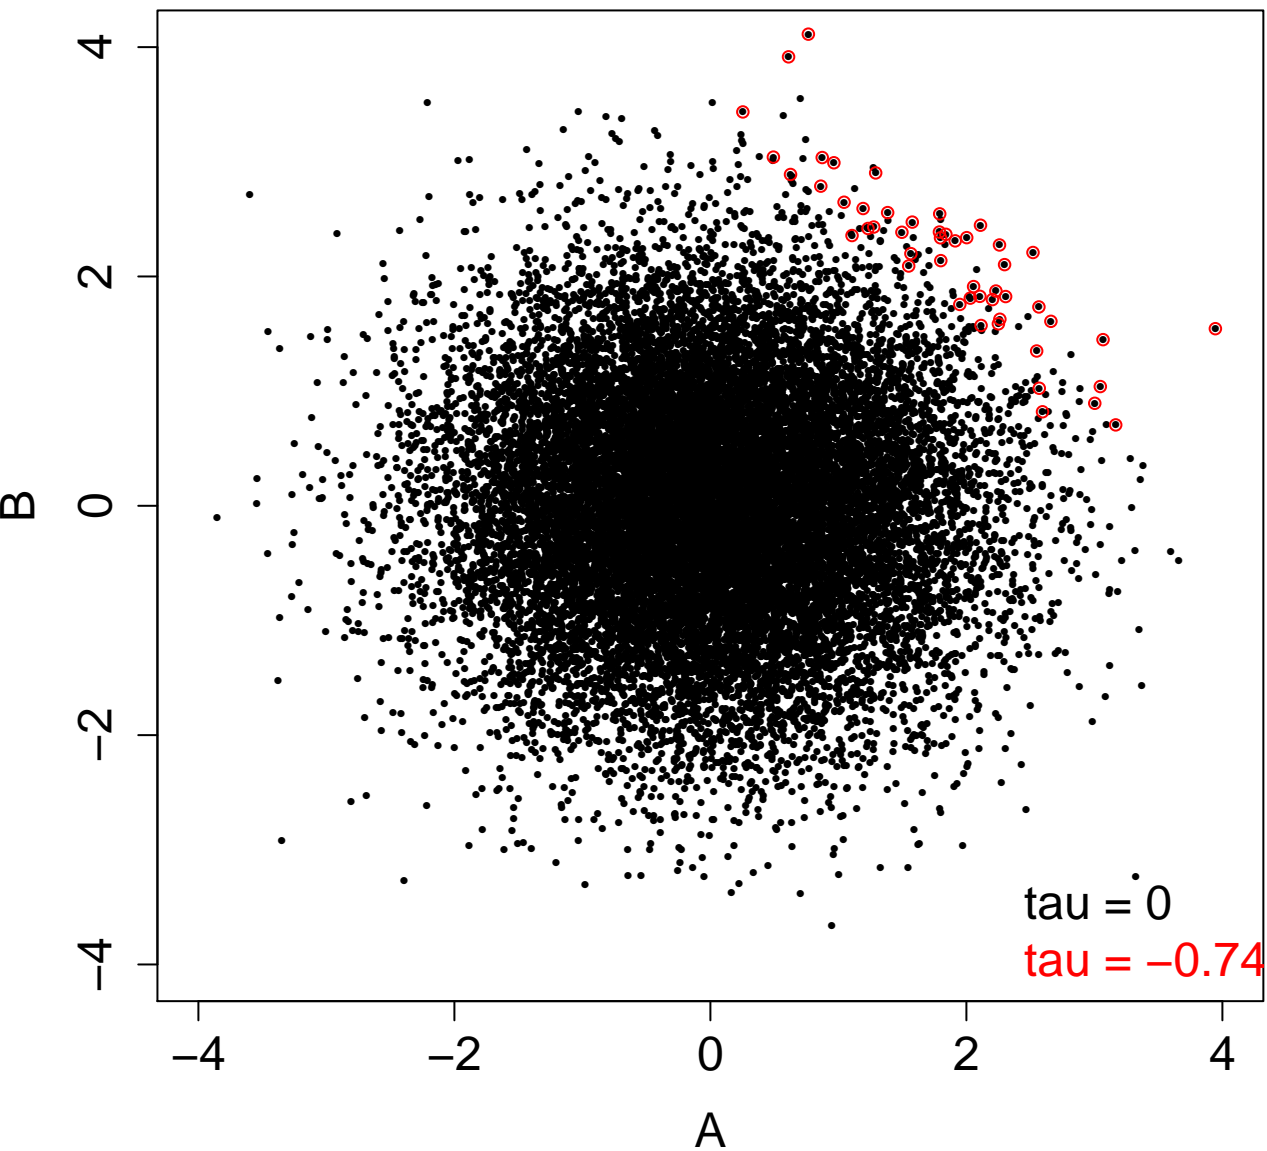

Supplement: Supplementary file 3 [file hess-2020-536-supplement.zip › Supplementary Material/S1/Scatter_AB_dep_0.pdf]

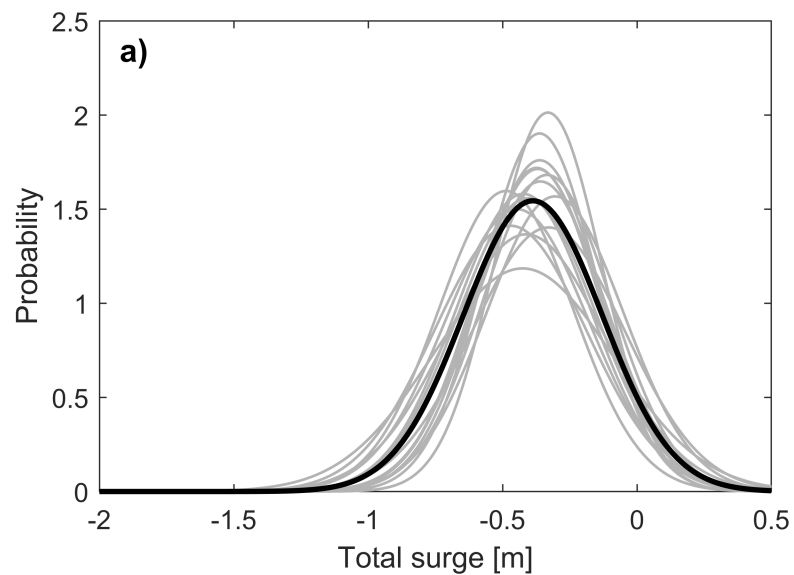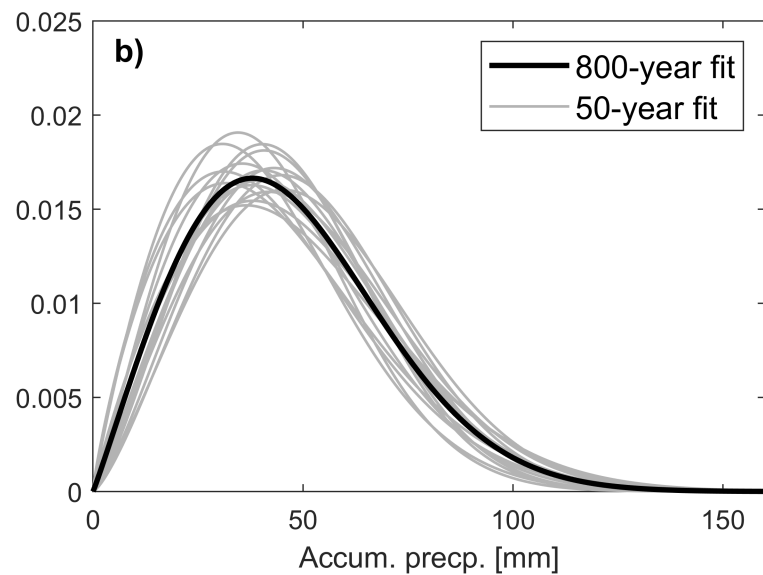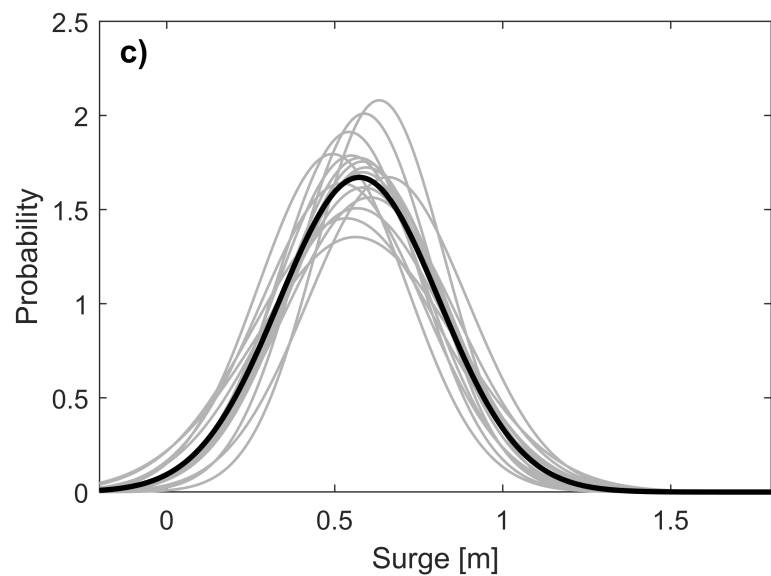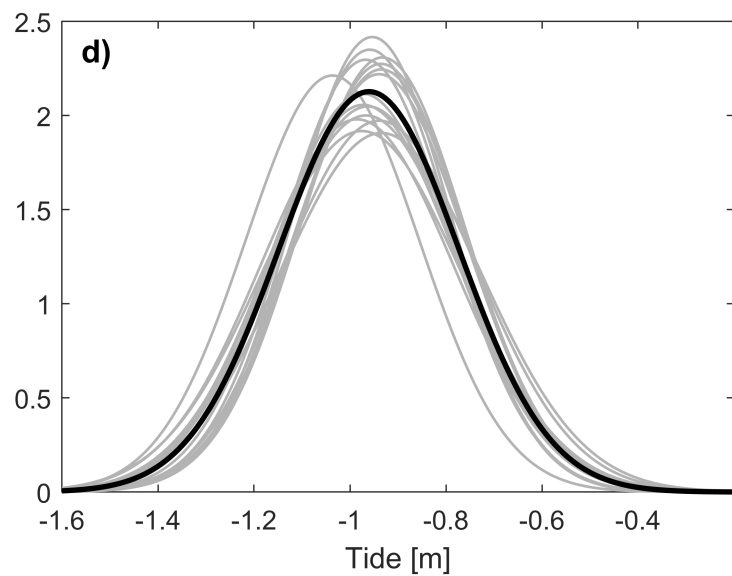

Supplement: Supplementary file 3 [file hess-2020-536-supplement.zip › Supplementary Material/S10.pdf]

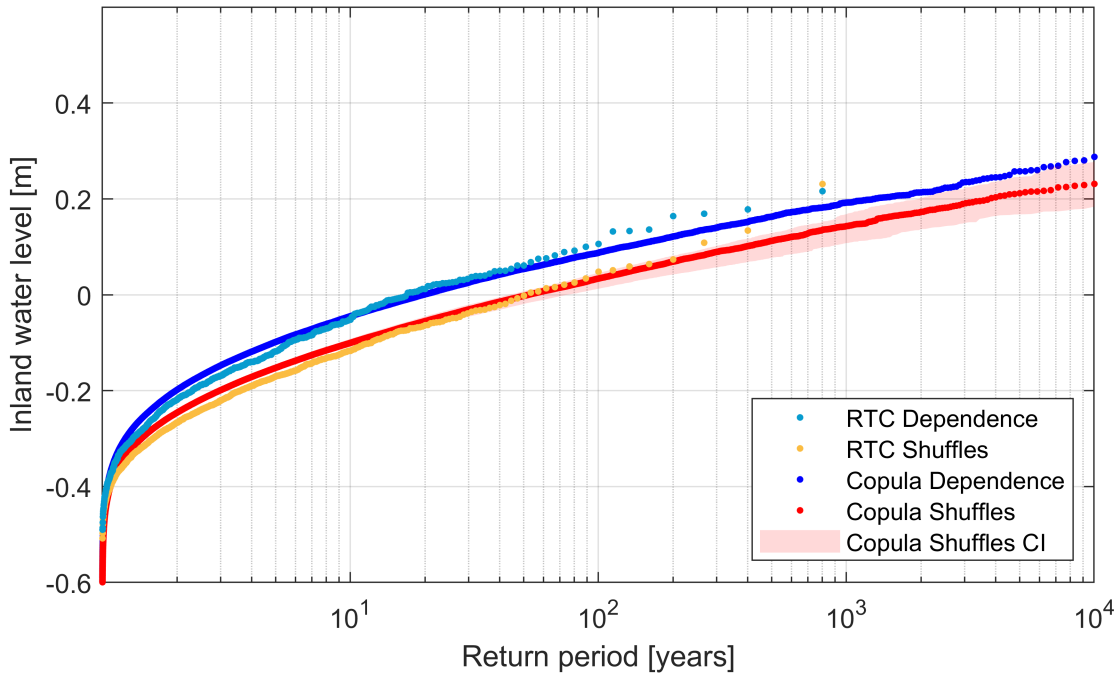

Supplement: Supplementary file 3 [file hess-2020-536-supplement.zip › Supplementary Material/S12.pdf]

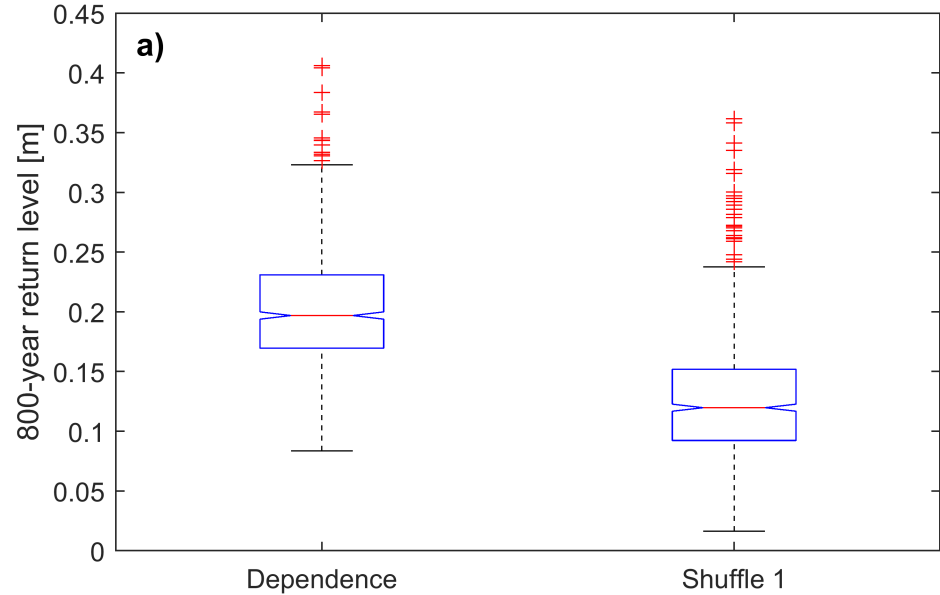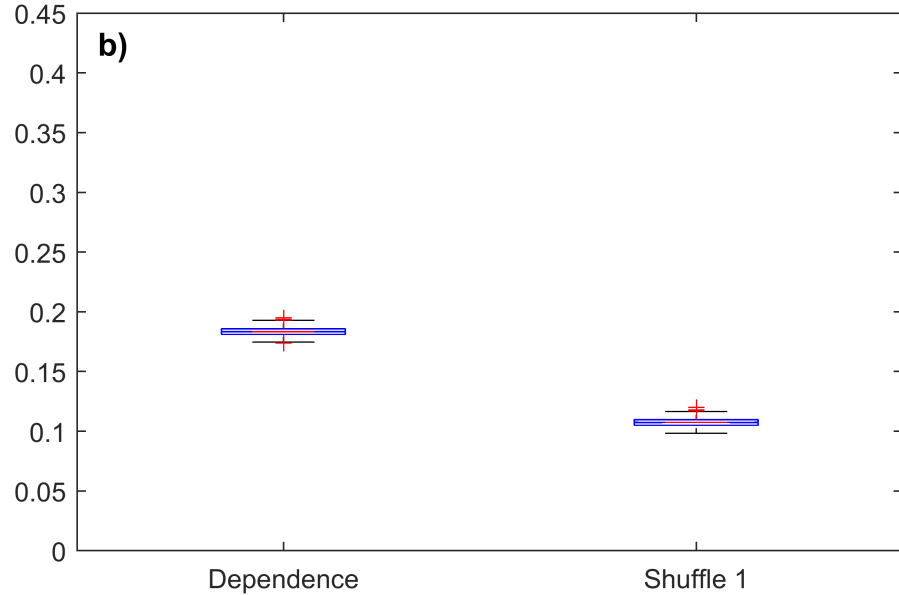

Supplement: Supplementary file 3 [file hess-2020-536-supplement.zip › Supplementary Material/S13.pdf]

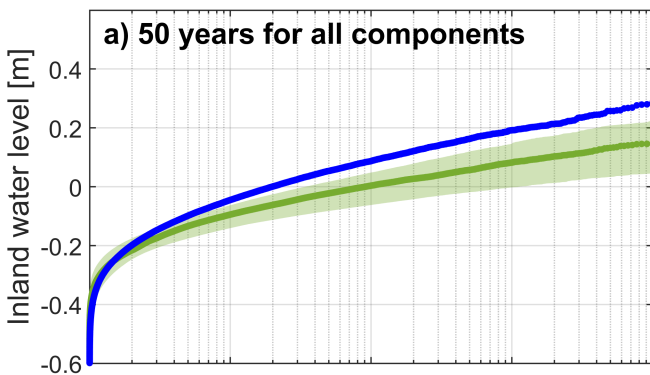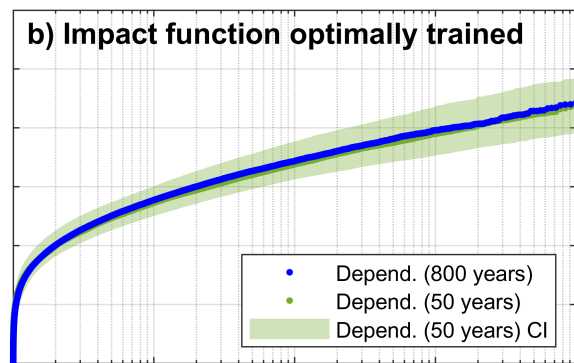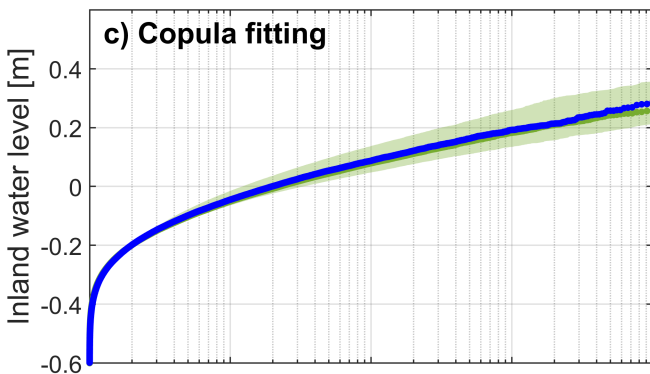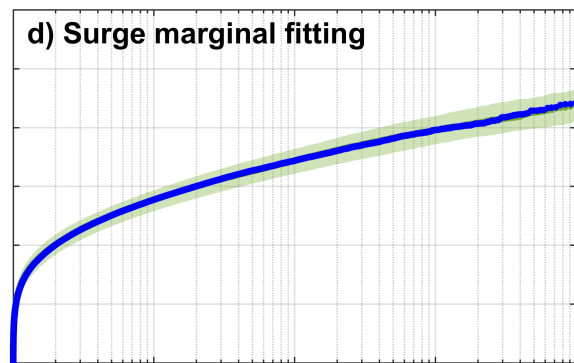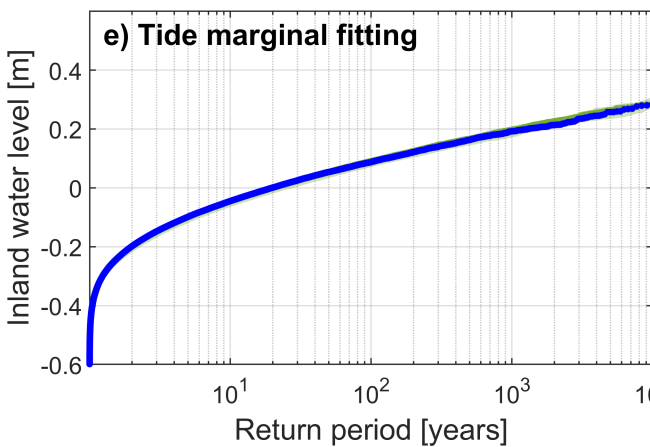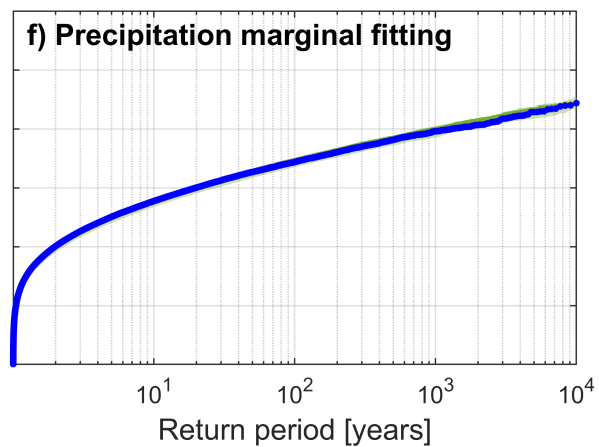

Supplement: Supplementary file 3 [file hess-2020-536-supplement.zip › Supplementary Material/S14.pdf]

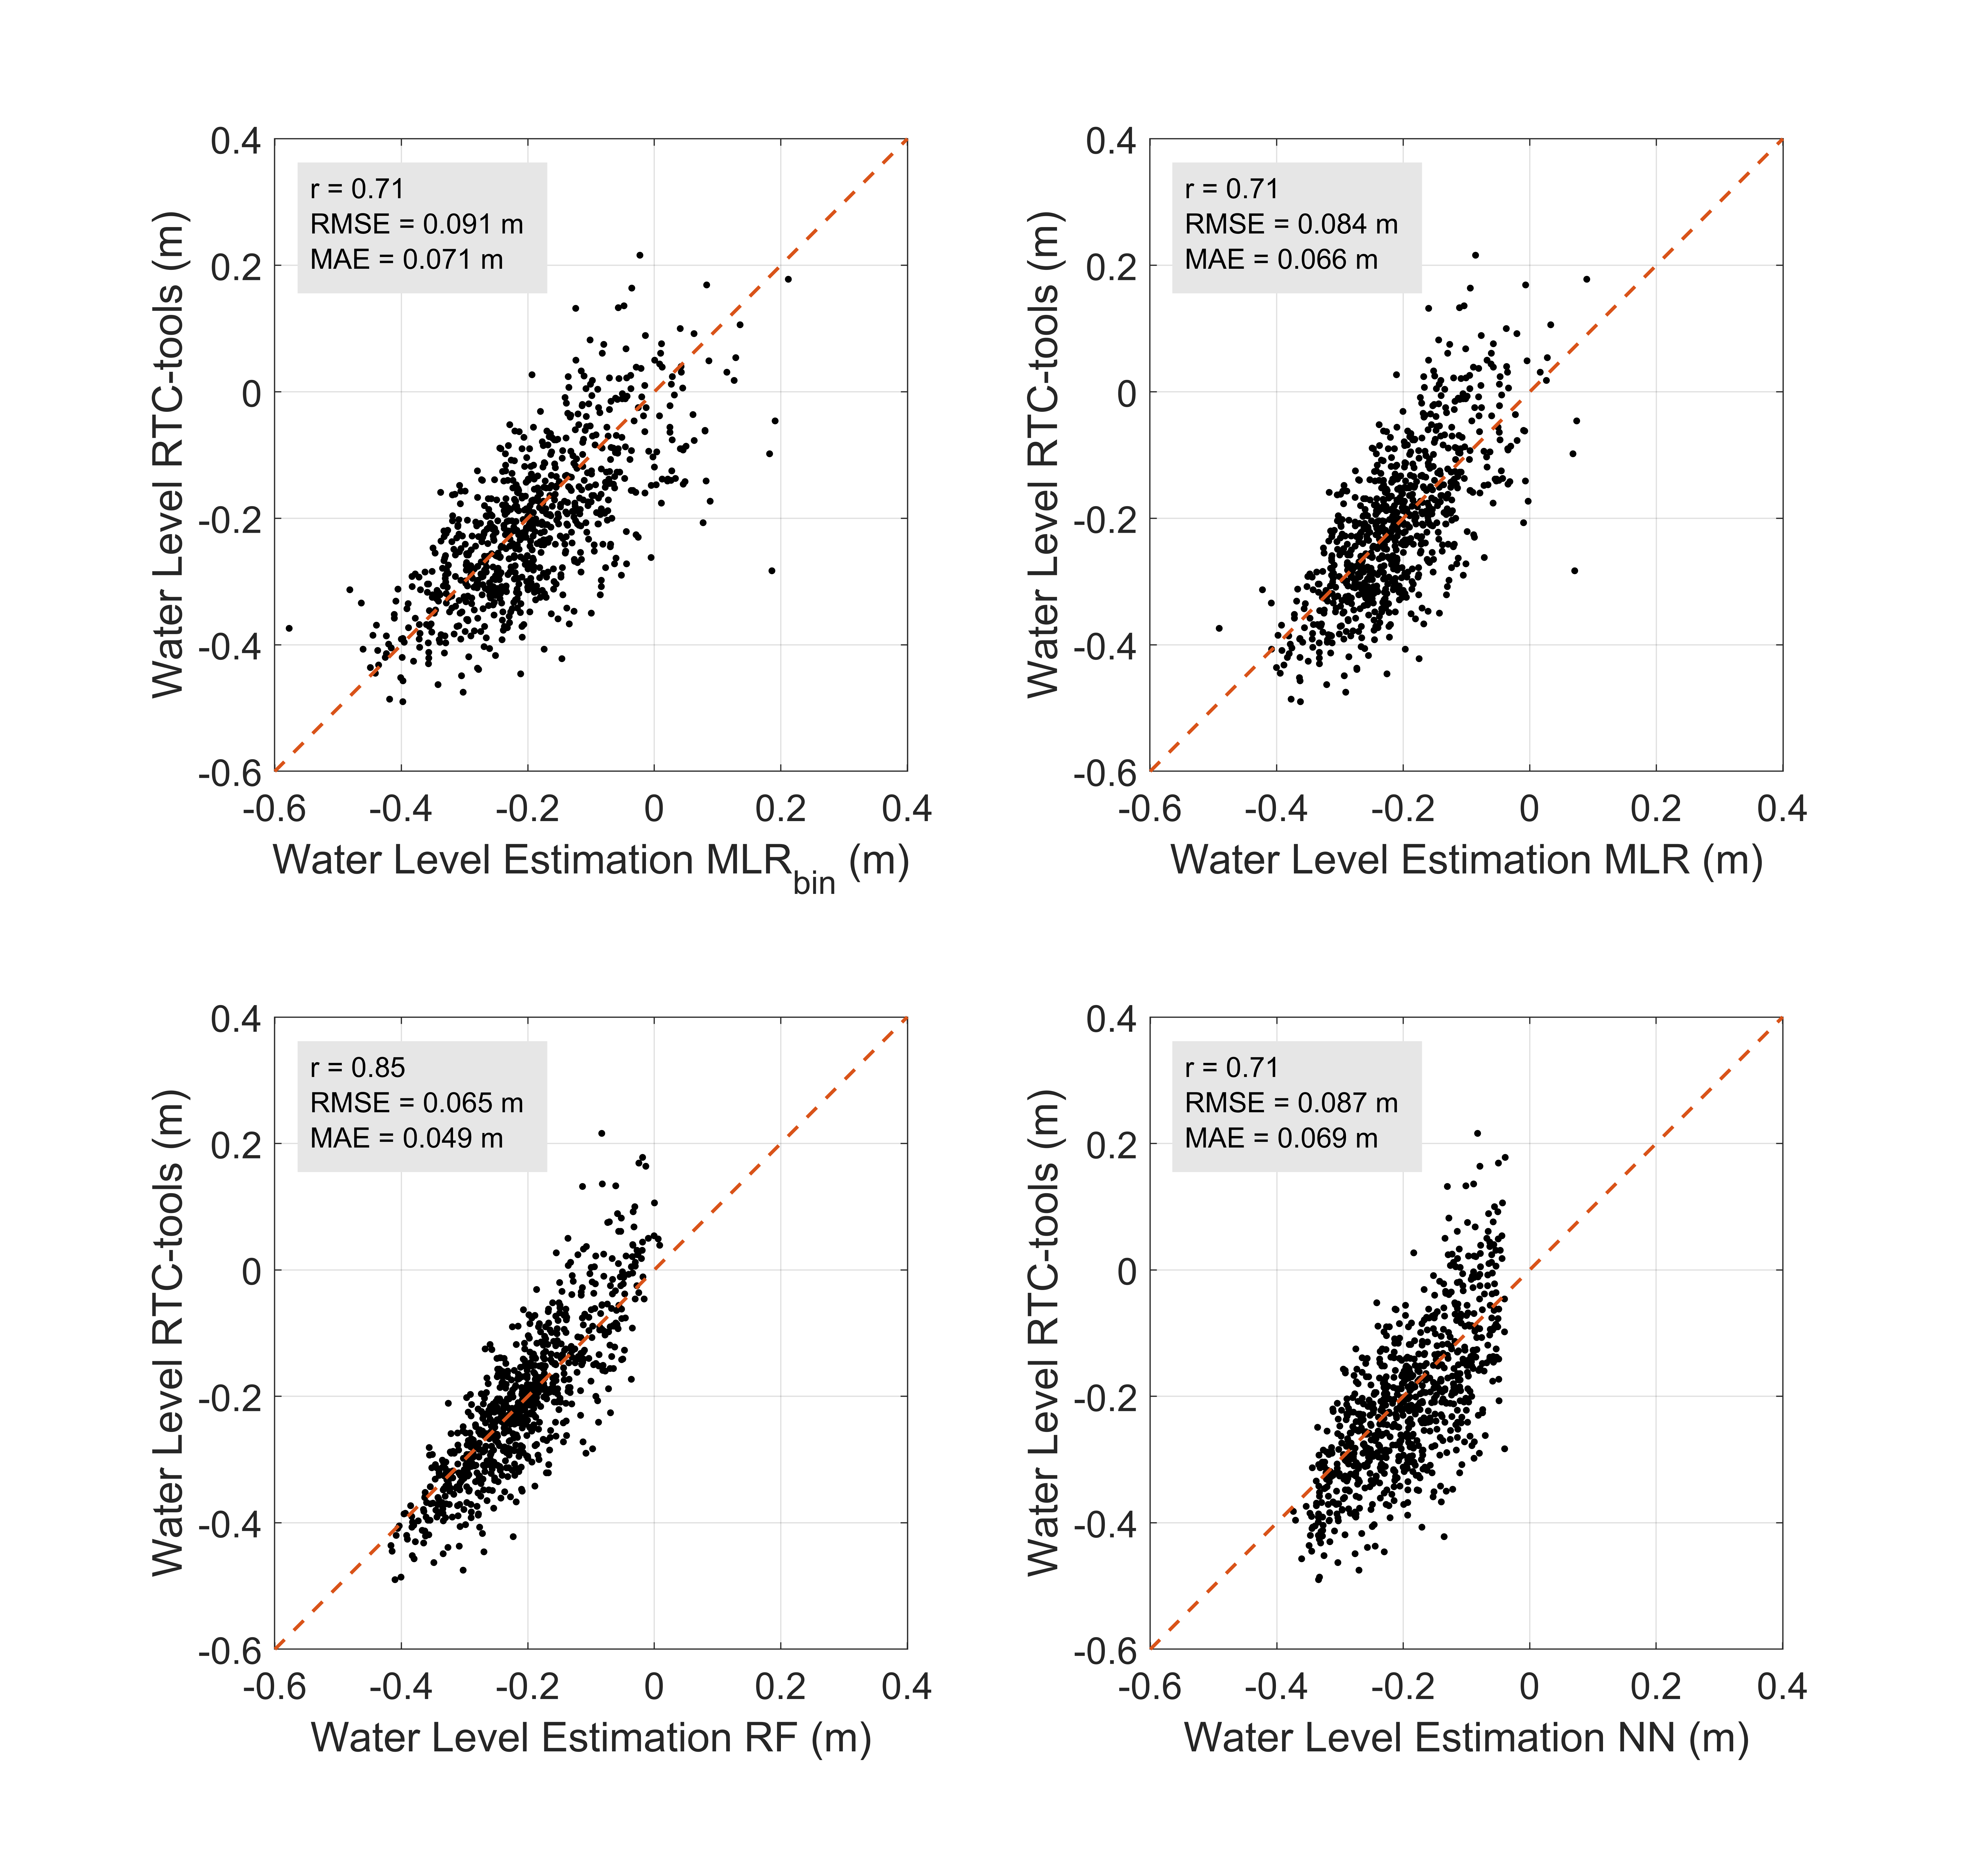

Supplement: Supplementary file 3 [file hess-2020-536-supplement.zip › Supplementary Material/S2.png]

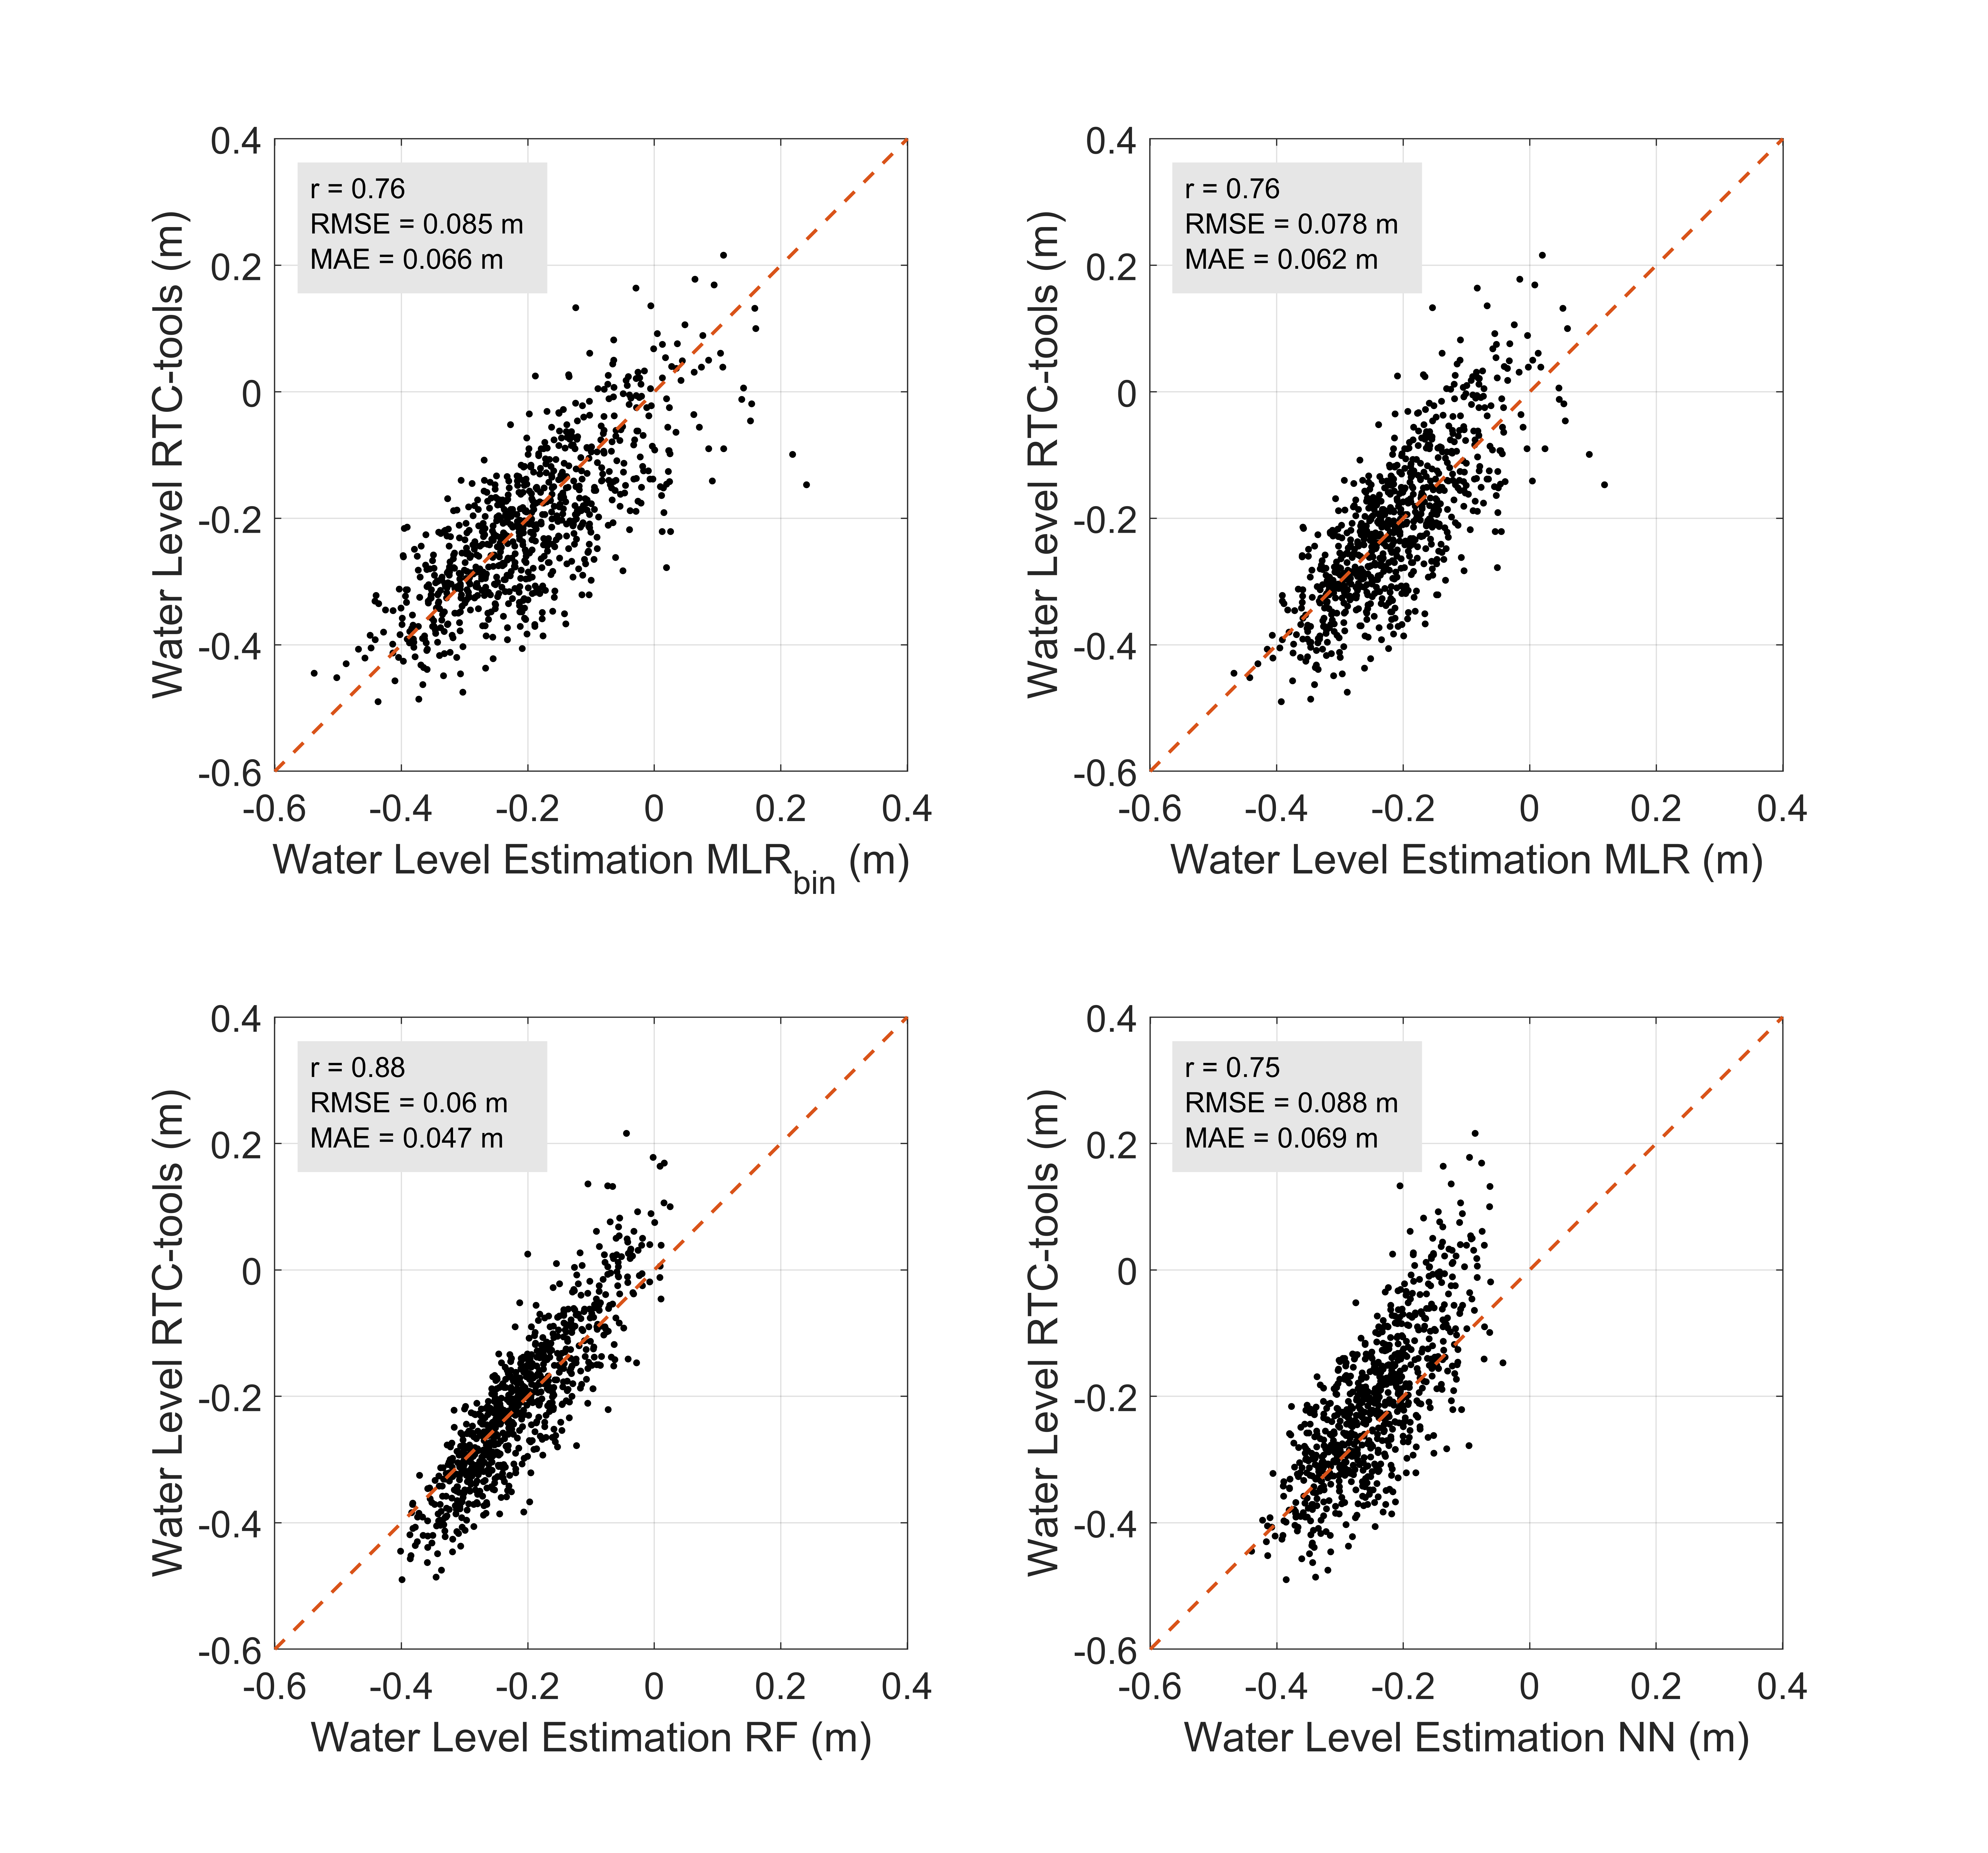

Supplement: Supplementary file 3 [file hess-2020-536-supplement.zip › Supplementary Material/S3.png]

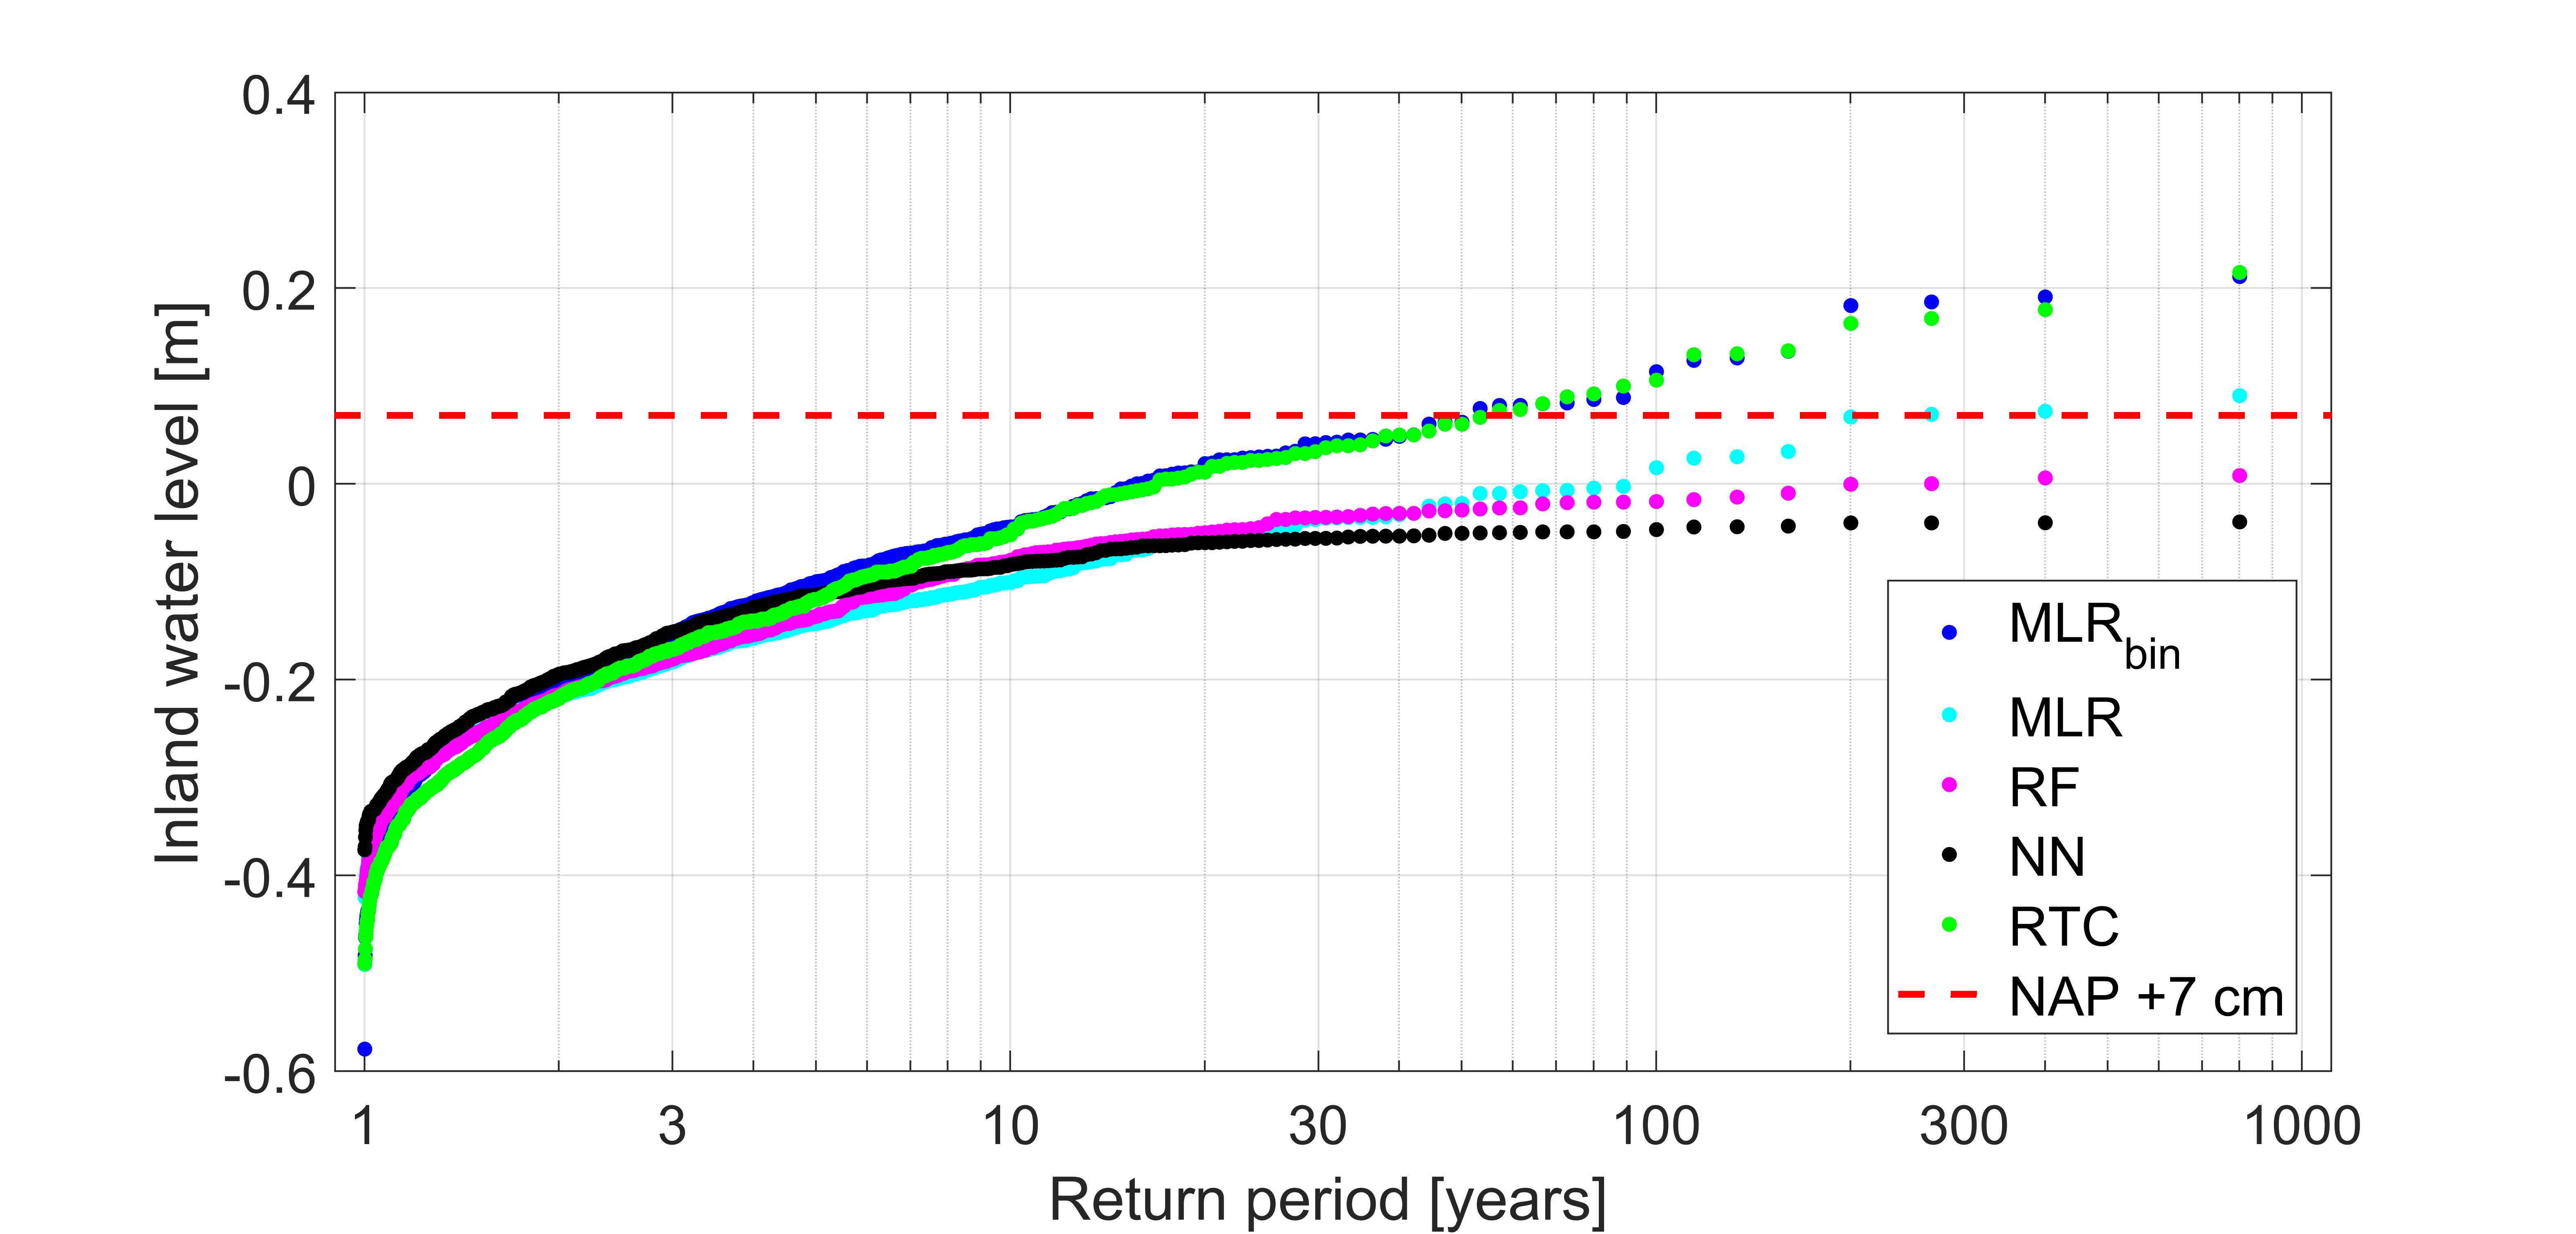

Supplement: Supplementary file 3 [file hess-2020-536-supplement.zip › Supplementary Material/S4.png]

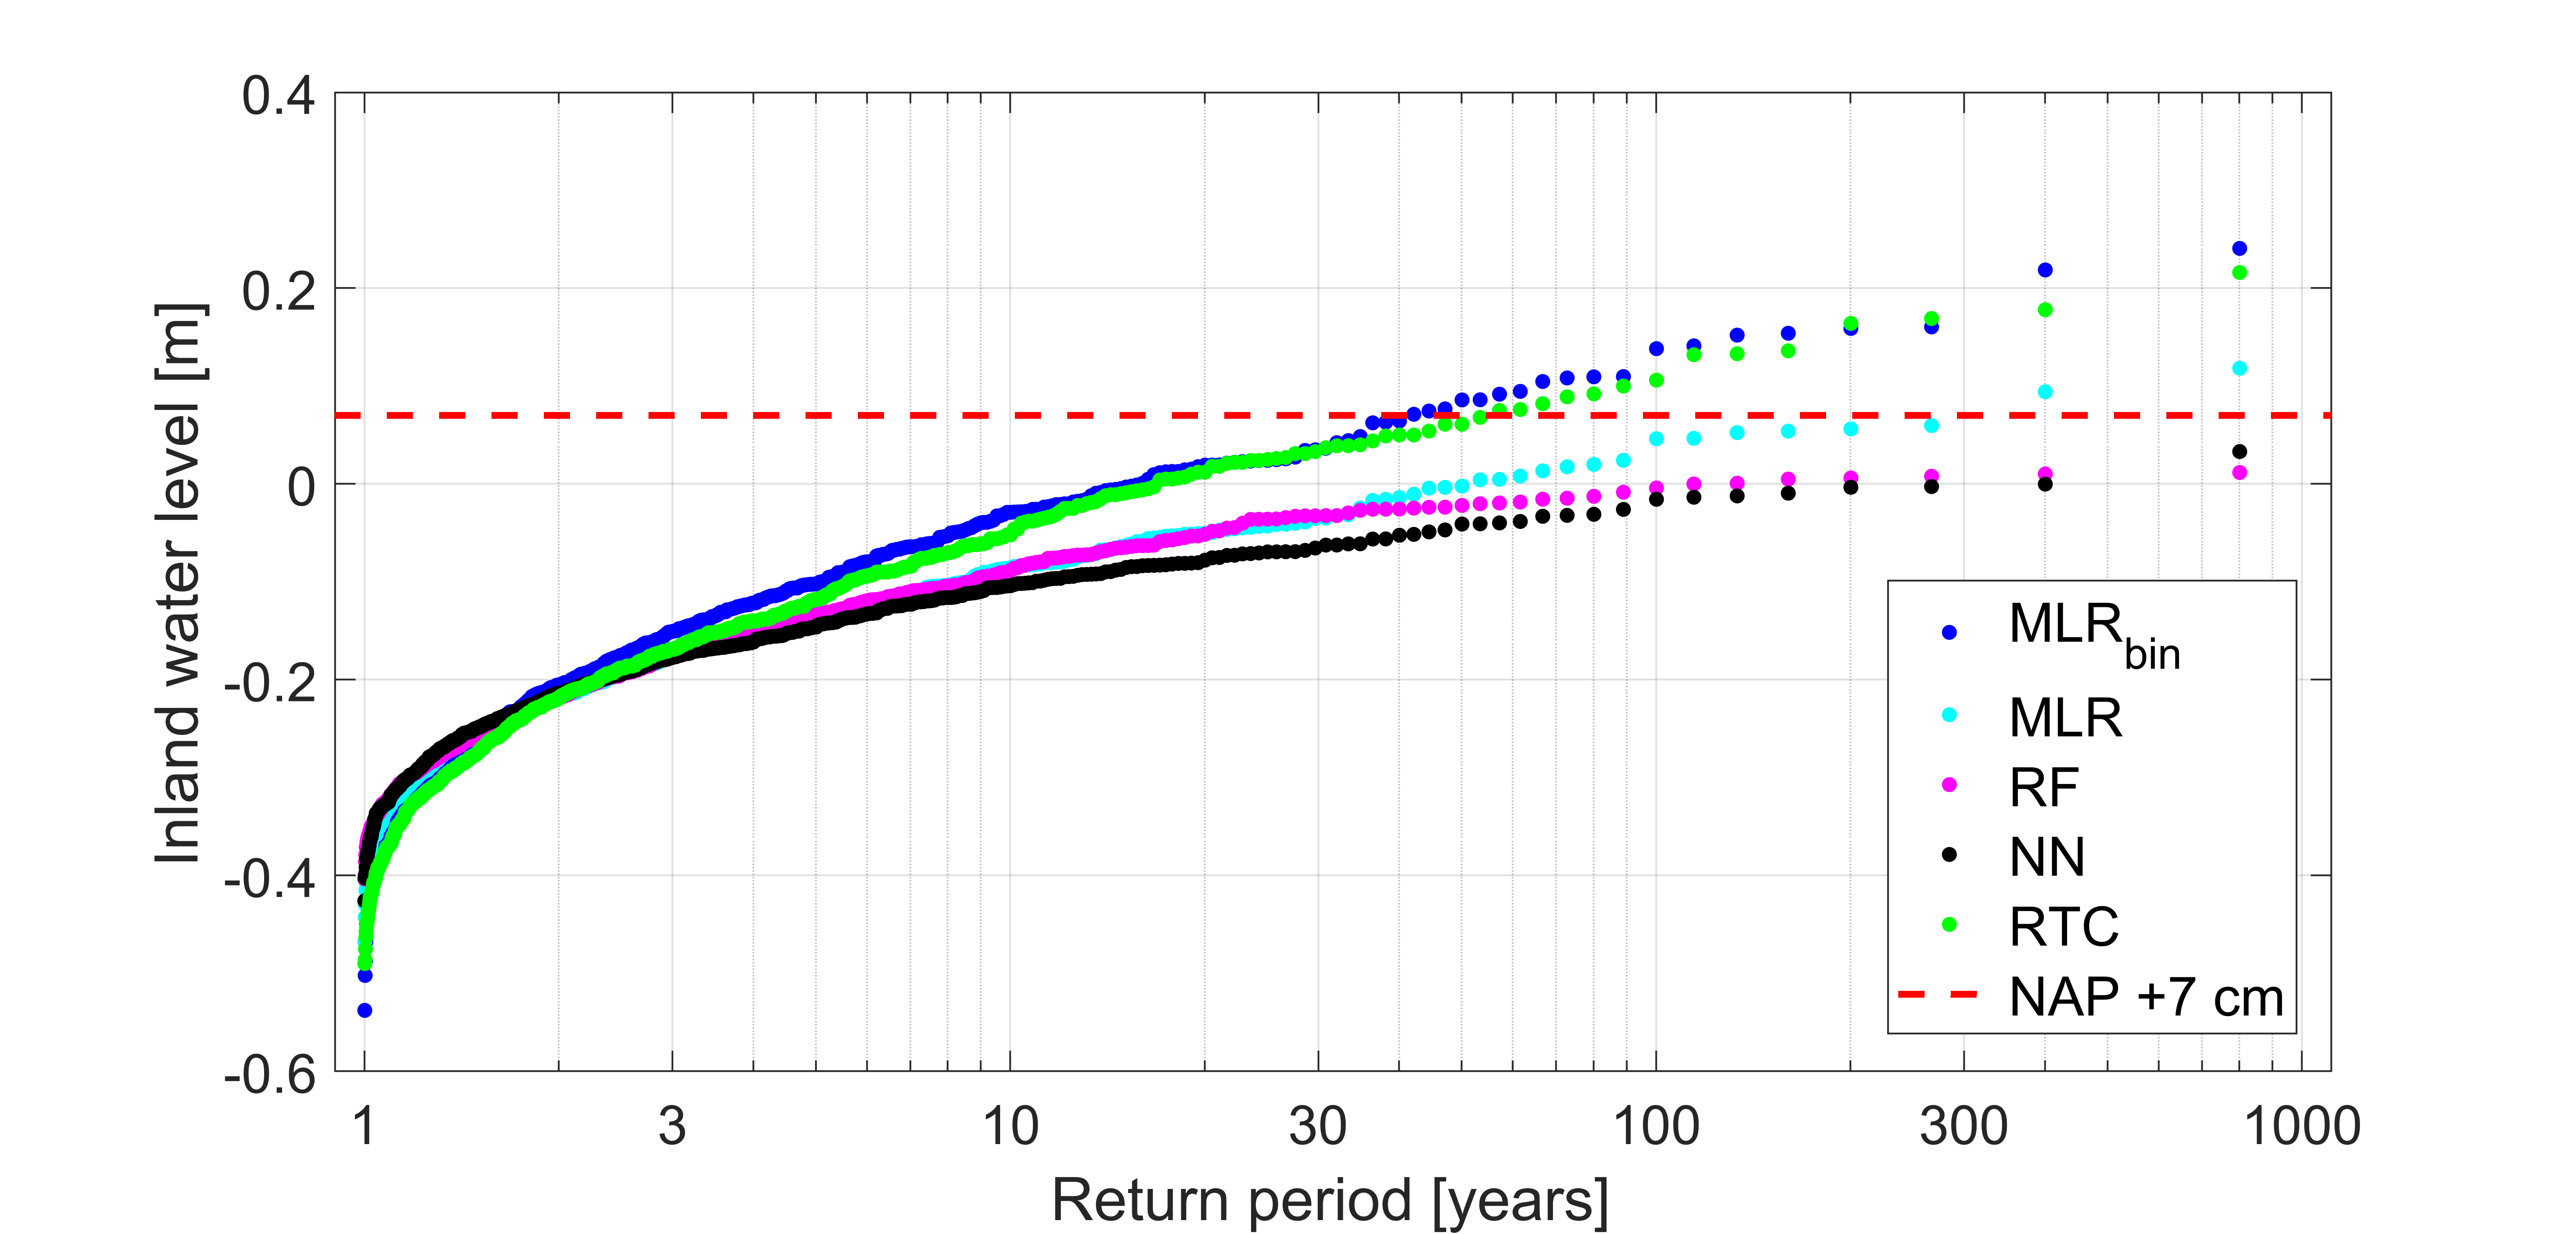

Supplement: Supplementary file 3 [file hess-2020-536-supplement.zip › Supplementary Material/S5.png]

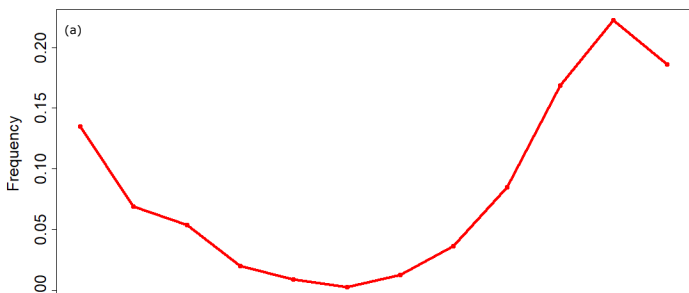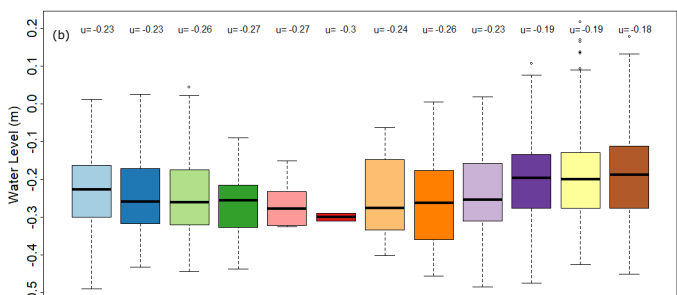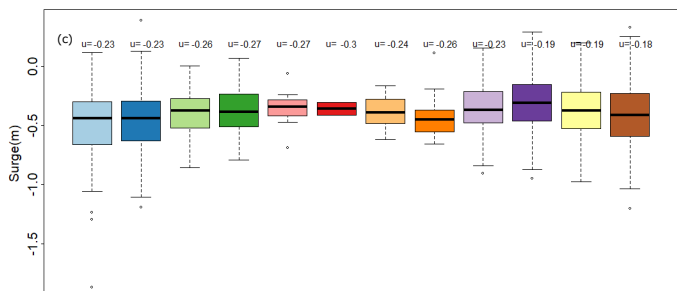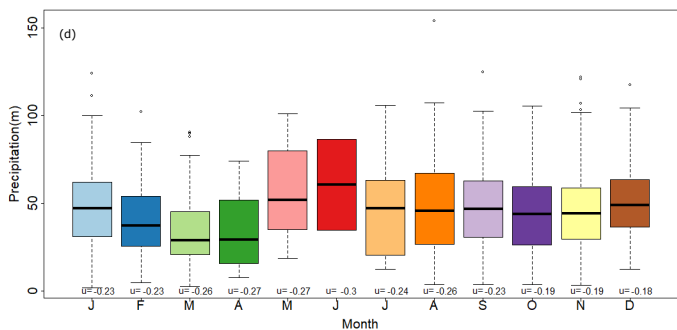

Supplement: Supplementary file 3 [file hess-2020-536-supplement.zip › Supplementary Material/S6.pdf]

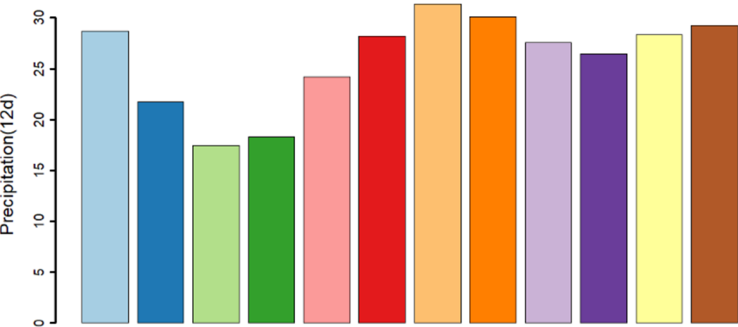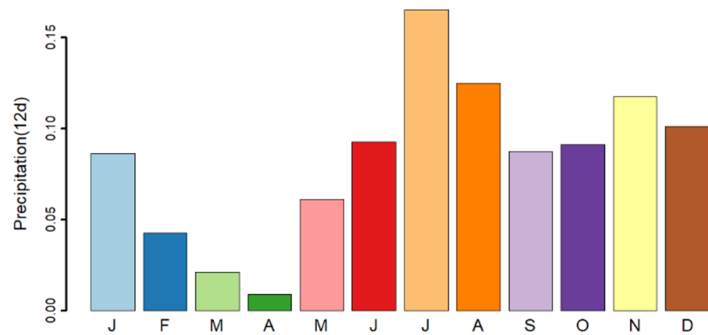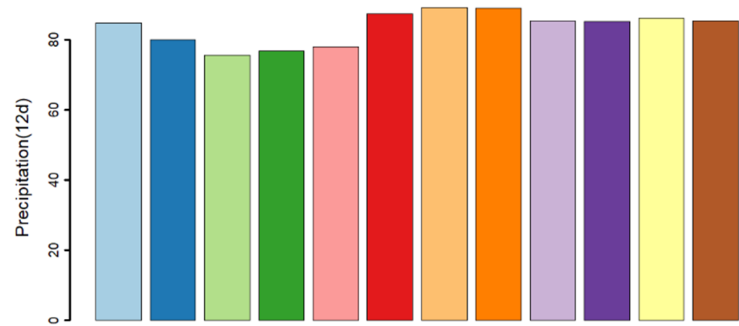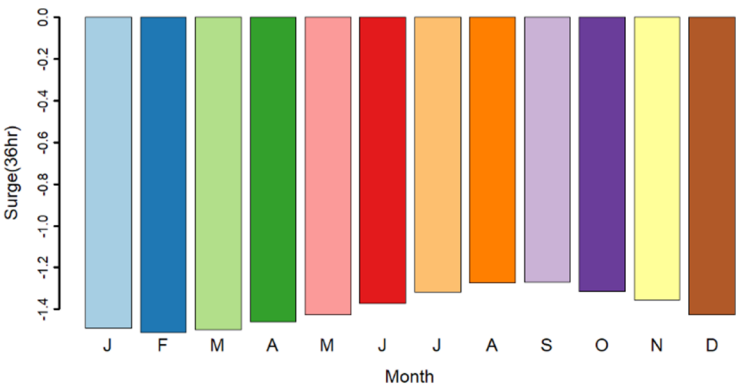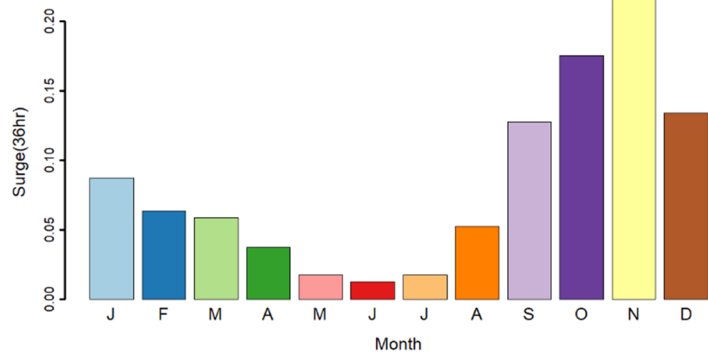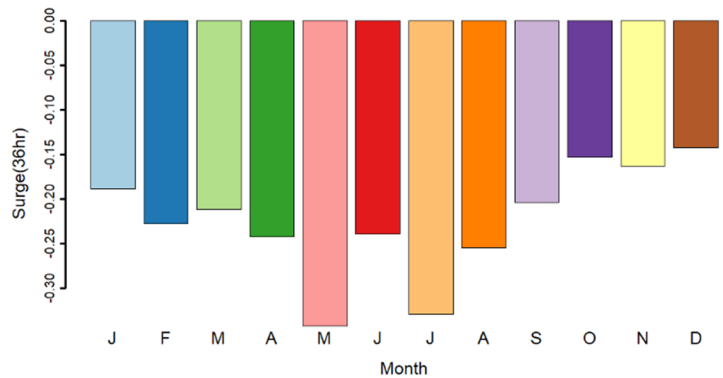

Supplement: Supplementary file 3 [file hess-2020-536-supplement.zip › Supplementary Material/S7.pdf]

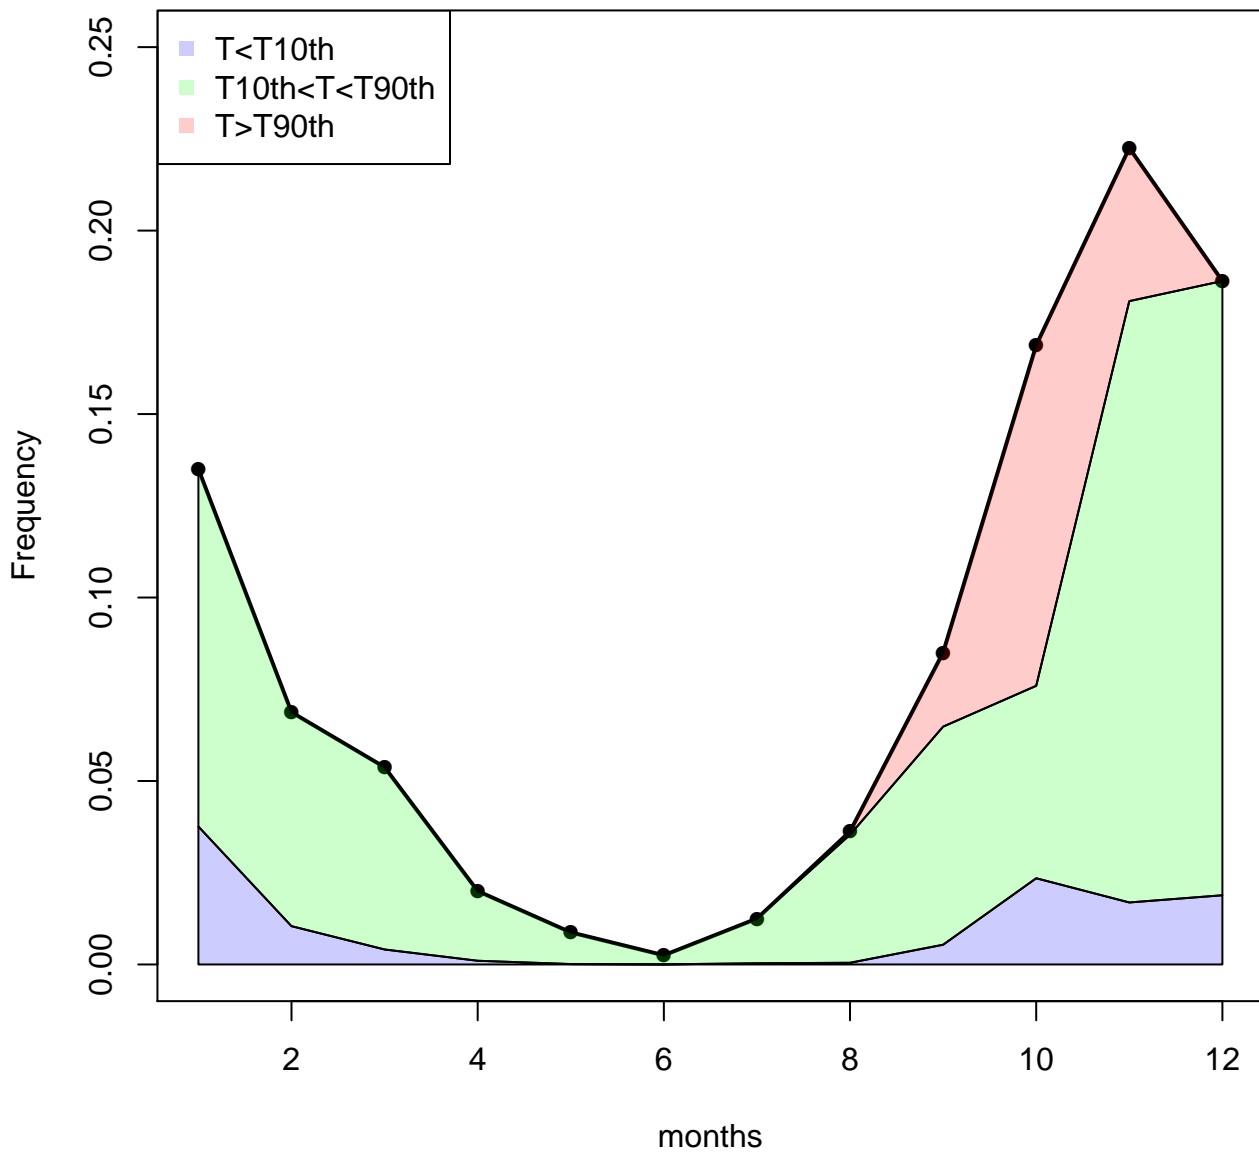

Supplement: Supplementary file 3 [file hess-2020-536-supplement.zip › Supplementary Material/S8.pdf]
